# Supplementary material for: Reviews on common objectives and evaluation indicators for risk communication activities from 2011 to 2017
Source: PeerJ. 2020 Aug 25;8:e9730. doi: 10.7717/peerj.9730 (PMC7453920; doi:10.7717/peerj.9730)
Supplement: Supplemental Information 1 [file peerj-08-9730-s001.xlsx]

## Sheet: TableS1
Table S1. Data extracted from selected articles.
ID	Publication Year	Author	Title	Journal	Volume	Issue	Pages	Abstract	Evaluation approach 1=Quantitative 2=Qualitative 3=Prior experiences and/or existing knowledge	Study field 1=Medicine 2=Food safety 3=Chemical substances 4=Nuclear and radiological disasters/emergencies 5=Other disasters/emergencies 6=Climate change 7=Other	Intervention timing 1=Non-/pre-crisis 2=Crisis 3=Post-crisis	Target audience 1=Citizens/NPOs 2=Other	Communication type 1=Individual/small group communication 2=Large group/mass communication	Objective/indicator 1=Knowledge increase 2=Communication satisfaction 3=Change in risk perception and concern alleviation 4=Reduction in psychological distress 5=Trust building 6=Decision making and behavior change 7=Self-efficacy improvement 8=Other	Number of Citations
1	2017	Shupei,Yuan; John C Besley	Talking aggressively about GMOs? Examining the effect of aggressive risk communication with communicator’s facial expression and gender	Journal of Risk Research	Published online: 20 Jul 2017			Abstract Two experiments (N = 229 and N = 268) assessed the effect of aggressive risk communication about GMOs by a scientist on respondents’ perceptions of message quality and writer (the scientist communicator) likability. We also considered two factors from the communicator that may influence how individuals process aggressive messages – facial expression (study 1) and the gender (study 2). Bo…	1	2	1	1	2	2,5	25
3	2017	Jonathon P Schuldt; Katherine A McComas; Colleen A Burge	Intersecting frames in communicating environmental risk and uncertainty	Journal of Risk Research	Published online: 09 Oct 2017			Abstract Risk scholars have long examined how public opinion about environmental issues is shaped by message framing devices, for example, as when climate change is portrayed as a ‘public health’ vs. ‘environmental health’ issue, or when the phenomenon itself is labeled as ‘global warming’ vs. ‘climate change.’ Yet, seldom do these framing devices occur in isolation; instead, they often co-occur …	1	6	1	1	2	3	0
19	2017	Cho, Tae Jin; Kim, Nam Hee; Hong, Yoon Ji; Park, ByoungIl; Kim, Hee Sung; Lee, Hyang Gi; Song, Min Kyung; Rhee, Min Suk	Development of an effective tool for risk communication about food safety issues after the Fukushima nuclear accident: What should be considered?	Food Control	79		17-26	Abstract Although the Fukushima nuclear accident (FNA) in 2011 led to strong public anxiety about radioactive contamination of foods, the most appropriate way to communicate this risk has been poorly researched. We sought to design, develop, evaluate, and optimize an effective risk communication (RC) tool for food consumers after the FNA. To design this tool, a classical systematic qualitative re…	1,2	2	3	1	2	1,2,3	22
20	2017	Hicks, Anna; Armijos, Maria Teresa; Barclay, Jenni; Stone, Jonathan; Robertson, Richard; Cortés, Gloria Patricia	Risk communication films: Process, product and potential for improving preparedness and behaviour change	International Journal of Disaster Risk Reduction	23		138-151	Abstract The medium of film is well established for education and communication about hazardous phenomena as it provides engaging ways to directly view hazards and their impacts. Empirical analysis can help to understand films' effectiveness in informing populations at risk and catalysing action to reduce risk. Using volcanic eruptions as a focus, an evidence-based methodology was devised to crea…	1	5	1	1	2	1,3,6	2
22	2017	Logar, Ivana; Brouwer, Roy	The effect of risk communication on choice behavior, welfare estimates and choice certainty	Water Resources and Economics	18		34-50	Abstract In stated preference research focusing on the elicitation of willingness to pay for reducing environmental or health risks, it is of crucial importance how risk is communicated to survey respondents. This study applies a split-sample approach to examine the effect of using a risk ladder on choice behavior, welfare estimates and choice certainty in a stated discrete choice experiment. It …	1	3	1	1	2	3,6	3
29	2017	Zhang, Mingguang; Wang, Xuedong; Mannan, M. Sam; Qian, Chengjiang; Wang, Ji yang	System dynamical simulation of risk perception for enterprise decision-maker in communication of chemical incident risks	Journal of Loss Prevention in the Process Industries	46		115-125	Abstract Risk communication is an effective way to understand, assess and manage risk of chemical industrial parks, a process which requires the involvement of stakeholders. However, different risk perceptions may cause sorts of barriers formed in risk communication, sometimes resulting in mass confrontation incidents. Enterprise decision-makers play a key role in this process and further risk de…	1	3	1	1	2	3	2
31	2017	Guidry, Jeanine P. D.; Jin, Yan; Orr, Caroline A.; Messner, Marcus; Meganck, Shana	Ebola on Instagram and Twitter: How health organizations address the health crisis in their social media engagement	Public Relations Review	43	3	477-486	Abstract Although social media have been used by public relations practitioners as a key vehicle for crisis communication, little is known about how these platforms were utilized by public health organizations in infectious disease outbreak situations and how this may have shaped the publics’ responses to the outbreak on and off social media. Taking the approach of strategic health risk communica…	1	1	2	1	2	2	26
38	2017	Charrière, Marie K. M.; Junier, Sandra J.; Bogaard, Thom A.; Mostert, Erik; Malet, Jean-Philippe; Giesen, Nick C. van de	The impact of an exhibition on risk awareness of the general public in mountainous areas	International Journal of Disaster Risk Reduction	25		36-59	Abstract This study investigates the impact of an exhibition on natural hazards on risk awareness of the inhabitants of the Ubaye Valley in southern France. Risk communication practices need to be effective to contribute to disaster reduction, but their impact is rarely evaluated. Using a pre-test/post-test research design as well as a longitudinal study, changes in awareness of adults, teenagers…	1	5	1	1	2	3,6	4
44	2017	Lu, Hang; Siemer, William F.; Baumer, Meghan S.; Decker, Daniel J.	Exploring the role of gain versus loss framing and point of reference in messages to reduce human–bear conflicts	The Social Science Journal	available online 25 May 2017			Abstract As a fundamental social process, communication can help natural resource managers prevent or manage many human–wildlife conflicts, but research on how to present effectively information that contributes to the reduction of human–wildlife conflicts is scant. We examined the effectiveness of point-of-reference and gain-versus-loss framing in heightening intentions to prevent human–black be…	1	7	1	1	2	3,6	2
61	2017	Bradford, Lori E. A.; Idowu, Blessing; Zagozewski, Rebecca; Bharadwaj, Lalita A.	There is no publicity like word of mouth… Lessons for communicating drinking water risks in the urban setting	Sustainable Cities and Society	29		23-40	Abstract Effective communication to citizens is of prime importance during public health crises involving water. This paper takes a sequential mixed method approach to the problem of communicating drinking water risks prevention of exposure to health risks in cities. City water officials are interviewed to learn about the goals of their drinking water communications strategies, and household surv…	1	3	1	1	1,2	1,6	3
67	2017	Choi, Ilsu; Lee, Dong Ho; Kim, Yongkuk	Effects of Timely Control Intervention on the Spread of Middle East Respiratory Syndrome Coronavirus Infection	Osong Public Health and Research Perspectives	8	6	373-376	Objectives: The 2015 Middle East Respiratory Syndrome Coronavirus (MERS-CoV) outbreak in Korea caused major economic and social problems. The control intervention was conducted during the MERS-CoV outbreak in Korea immediately after the confirmation of the index case. This study investigates whether the early risk communication with the general public and mass media is an effective preventive str…	1	1	2	1	2	8	1
69	2017	Harmsen, Marline G.; Steenbeek, Miranda P.; Hoogerbrugge, Nicoline; van Doorn, Helena C.; Gaarenstroom, Katja N.; Vos, M. Caroline; Massuger, Leon F. A. G.; de Hullu, Joanne A.; Hermens, Rosella P. M. G.	A patient decision aid for risk-reducing surgery in premenopausal BRCA1/2 mutation carriers: Development process and pilot testing	Health Expectations: An International Journal of Public Participation in Health Care & Health Policy	Epub 2017 Dec 27			BACKGROUND: BRCA1/2 mutation carriers' choice between risk-reducing salpingo-oophorectomy (RRSO) and salpingectomy with delayed oophorectomy is very complex. Aim was to develop a patient decision aid that combines evidence with patient preferences to facilitate decision making. DESIGN: Systematic development of a patient decision aid in an iterative process of prototype development, alpha testing…	1	1	1	1,2	1	2,6	2
71	2017	Murakami, Michio; Suzuki, Mai; Yamaguchi, Tomiko	Presenting information on regulation values improves the public's sense of safety: Perceived mercury risk in fish and shellfish and its effects on consumption intention	PLoS One	12	12	e0188758	Risk communication aims to promote health and understanding through information exchange; however, explanations regarding the basis of regulation values for the public are insufficient. Moreover, it is unclear how information presentation affects the public's sense of safety and their consumption intentions. We first investigated the relationship between perception of mercury-risk in fish and she…	1	2	1	1	2	3,6	21
78	2017	Gong, Jingjing; Zhang, Yan; Gao, Hongyan; Wei, Wei; Lv, Jing; Liu, Hongyun; Huang, Yonghua	Choices Regarding Thrombolysis Are Modified by the Way to Transfer the Messages	Frontiers in neurology	8		589	Although thrombolysis is the most effective medical treatment for acute ischemic stroke, many stroke patients eligible for thrombolysis miss this treatment as a result of delay or refusal by the patients and/or their proxies. To explore the influences of prognostic information for different intervals from stroke onset to the start of thrombolytic treatment (OTT) and other factors on the preferenc…	1	1	1	1	1	6	0
81	2017	Bubeck, Philip; Wouter Botzen, W. J.; Laudan, Jonas; Aerts, Jeroen C. J. H.; Thieken, Annegret H.	Insights into Flood-Coping Appraisals of Protection Motivation Theory: Empirical Evidence from Germany and France	Risk Analysis	Epub 2017 Nov 17			Protection motivation theory (PMT) has become a popular theory to explain the risk-reducing behavior of residents against natural hazards. PMT captures the two main cognitive processes that individuals undergo when faced with a threat, namely, threat appraisal and coping appraisal. The latter describes the evaluation of possible response measures that may reduce or avert the perceived threat. Alt…	1	5	1	1	1,2	3,6,7	8
84	2017	Hedberg, Berith; Malm, Dan; Karlsson, Jan-Erik; Arestedt, Kristofer; Brostrom, Anders	Factors associated with confidence in decision making and satisfaction with risk communication among patients with atrial fibrillation	European journal of cardiovascular nursing : journal of the Working Group on Cardiovascular Nursing of the European Society of Cardiology	Epub 2017 Nov 14			BACKGROUND: Atrial fibrillation is a prevalent cardiac arrhythmia. Effective communication of risks (e.g. stroke risk) and benefits of treatment (e.g. oral anticoagulants) is crucial for the process of shared decision making. AIM: The aim of this study was to explore factors associated with confidence in decision making and satisfaction with risk communication after a follow-up visit among patien…	1	1	1	1	1	2,6	0
97	2017	Qiu, Wuqi; Chu, Cordia; Hou, Xiaohui; Rutherford, Shannon; Zhu, Bin; Tong, Zhendong; Mao, Ayan	A Comparison of China's Risk Communication in Response to SARS and H7N9 Using Principles Drawn From International Practice	Disaster Medicine and Public Health Preparedness	Epub 2017 Oct 4			BACKGROUND: China's emergency management of severe acute respiratory syndrome (SARS) was heavily criticized, whereas the H7N9 response was praised by the international community. Aims The aims of this study were to examine and compare the strengths and weaknesses of risk communication conducted in response to SARS and H7N9 and their associated social impacts on affected communities in China. METH…	2	1	2	2	1	5	1
98	2017	Okan, Yasmina; Stone, Eric R.; Bruine de Bruin, Wandi	Designing Graphs that Promote Both Risk Understanding and Behavior Change	Risk Analysis	Epub 2017 Oct 3			Graphs show promise for improving communications about different types of risks, including health risks, financial risks, and climate risks. However, graph designs that are effective at meeting one important risk communication goal (promoting risk-avoidant behaviors) can at the same time compromise another key goal (improving risk understanding). We developed and tested simple bar graphs aimed at…	1	1	1	1	2	1,2,3,6	9
106	2017	Nakayachi, Kazuya; B Johnson, Branden; Koketsu, Kazuki	Effects of Acknowledging Uncertainty about Earthquake Risk Estimates on San Francisco Bay Area Residents' Beliefs, Attitudes, and Intentions	Risk Analysis	Epub 2017 Aug 29			We test here the risk communication proposition that explicit expert acknowledgment of uncertainty in risk estimates can enhance trust and other reactions. We manipulated such a scientific uncertainty message, accompanied by probabilities (20%, 70%, implicit ["will occur"] 100%) and time periods (10 or 30 years) in major (≥magnitude 8) earthquake risk estimates to test potential effects on reside…	1	5	1	1	1	3,5,6	3
110	2017	Betts, Kevin R.; Boudewyns, Vanessa; Aikin, Kathryn J.; Squire, Claudia; Dolina, Suzanne; Hayes, Jennifer J.; Southwell, Brian G.	Serious and actionable risks, plus disclosure: Investigating an alternative approach for presenting risk information in prescription drug television advertisements	Research in Social & Administrative Pharmacy : RSAP	Epub 2017 Aug 2			BACKGROUND: Broadcast direct-to-consumer (DTC) prescription drug ads that present product claims are required to also present the product's major risks. Debate exists regarding how much information should be included in these major risk statements. Some argue that such statements expose people to unnecessary amounts of information, while others argue that they leave out important information. OBJ…	1	1	1	1	2	1,3,6	2
118	2017	Marti, Michele; Stauffacher, Michael; Matthes, Jorg; Wiemer, Stefan	Communicating Earthquake Preparedness: The Influence of Induced Mood, Perceived Risk, and Gain or Loss Frames on Homeowners' Attitudes Toward General Precautionary Measures for Earthquakes	Risk Analysis	Epub 2017 Aug 11			Despite global efforts to reduce seismic risk, actual preparedness levels remain universally low. Although earthquake-resistant building design is the most efficient way to decrease potential losses, its application is not a legal requirement across all earthquake-prone countries and even if, often not strictly enforced. Risk communication encouraging homeowners to take precautionary measures is …	1	5	1	1	2	3	1
120	2017	Knoblauch, Theresa A. K.; Stauffacher, Michael; Trutnevyte, Evelina	Communicating Low-Probability High-Consequence Risk, Uncertainty and Expert Confidence: Induced Seismicity of Deep Geothermal Energy and Shale Gas	Risk Analysis	Epub 2017 Aug 10.			Subsurface energy activities entail the risk of induced seismicity including low-probability high-consequence (LPHC) events. For designing respective risk communication, the scientific literature lacks empirical evidence of how the public reacts to different written risk communication formats about such LPHC events and to related uncertainty or expert confidence. This study presents findings from…	1	5	1	1	2	1,2,3,5	6
125	2017	Boyle, R. J.; Umasunthar, T.; Smith, J. G.; Hanna, H.; Procktor, A.; Phillips, K.; Pinto, C.; Gore, C.; Cox, H. E.; Warner, J. O.; Vickers, B.; Hodes, M.	A brief psychological intervention for mothers of children with food allergy can change risk perception and reduce anxiety: Outcomes of a randomized controlled trial	Clinical & Experimental Allergy : journal of the British Society for Allergy and Clinical Immunology	47	10	1309-1317	BACKGROUND: Mothers of children with food allergy have increased anxiety, which may be influenced by healthcare professionals' communication of risk. OBJECTIVE: To evaluate a brief psychological intervention for reducing anxiety in mothers of children with food allergy. METHODS: Two hundred mothers of children with food allergy were recruited from allergy clinics. A computer-generated randomizati…	1	1	1	1	1	3,4	2
130	2017	Baicus, Cristian; Delcea, Caterina; Dima, Alina; Oprisan, Emilia; Jurcut, Ciprian; Dan, Gheorghe Andrei	Influence of decision aids on oral anticoagulant prescribing among physicians: a randomised trial	European Journal of Clinical Investigation	47	9	649-658	BACKGROUND: Oral anticoagulants (OAC) are underused in treatment of atrial fibrillation (AF), with differences in patient and physician preferences. For risk communication, the graphic showing risks on treatment contains all the information, therefore, the graphic showing risks without treatment may not be necessary. Here, our objective was to assess whether decision aids require information of r…	1	1	1	2	2	6	5
133	2017	Cheng, Sun-Long; Liao, Hsien-Hua; Shueng, Pei-Wei; Lee, Hsi-Chieh; Cheewakriangkrai, Chalong; Chang, Chi-Chang	Exploring Oral Cancer Patients' Preference in Medical Decision Making and Quality of Life	Studies in Health Technology and Informatics	238		32-35	Little is known about the clinical effects of shared medical decision making (SMDM) associated with quality of life about oral cancer? To understand patients who occurred potential cause of SMDM and extended to explore the interrelated components of quality of life for providing patients with potential adaptation of early assessment. All consenting patients completed the SMDM questionnaire and 36…	1	1	1	1	1	8	0
134	2017	Yamamoto, Michiko; Doi, Hirohisa; Yamamoto, Ken; Watanabe, Kazuhiro; Sato, Tsugumichi; Suka, Machi; Nakayama, Takeo; Sugimori, Hiroki	Adaptation of the European Commission-recommended user testing method to patient medication information leaflets in Japan	Drug, Healthcare and Patient Safety	9		39-63	BACKGROUND: The safe use of drugs relies on providing accurate drug information to patients. In Japan, patient leaflets called Drug Guide for Patients are officially available; however, their utility has never been verified. This is the first attempt to improve Drug Guide for Patients via user testing in Japan. PURPOSE: To test and improve communication of drug information to minimize risk for pa…	1	1	1	1	2	2	6
143	2017	Gesser-Edelsburg, Anat; Fridman, Talia; Lev-Wiesel, Rachel	Edutainment as a Strategy for Parental Discussion With Israeli Children: The Potential of a Children's Play in Preventing Sexual Abuse	Journal of Child Sexual Abuse	26	5	553-572	Edutainment is a communication strategy to influence attitudes and behaviors through the use of the media. Through the children's play "Yael Learns to Take Care of Her Body," designed for joint viewing by children aged 5-8 and their parents, sexual abuse is raised. This qualitative study findings indicate that parents from low socioeconomic subgroups from the secular sector reported that their aw…	2	1	1	1	1	1,3,6	0
151	2017	Eyler, Rachel F.; Cordes, Sara; Szymanski, Benjamin R.; Fraenkel, Liana	Utilization of Continuous "Spinners" to Communicate Risk	Medical Decision Making	37	6	725-729	BACKGROUND: As patients become more involved in their medical care, they must consider the specific probabilities of both positive and negative outcomes associated with different treatments. Patients who are low in numeracy may be at a disadvantage when making these decisions. This study examined the use of a "spinner" to present probabilistic information compared to a numerical format and icon a…	1	1	1	1	1	1,2,6	4
152	2017	Bruine de Bruin, Wandi; Wallin, Annika; Parker, Andrew M.; Strough, JoNell; Hanmer, Janel	Effects of Anti- Versus Pro-Vaccine Narratives on Responses by Recipients Varying in Numeracy: A Cross-sectional Survey-Based Experiment	Medical Decision Making	37	8	860-870	BACKGROUND: To inform their health decisions, patients may seek narratives describing other patients' evaluations of their treatment experiences. Narratives can provide anti-treatment or pro-treatment evaluative meaning that low-numerate patients may especially struggle to derive from statistical information. Here, we examined whether anti-vaccine (v. pro-vaccine) narratives had relatively strong…	1	1	1	1	1	2,6	6
161	2017	Schwartz, Peter H.; Perkins, Susan M.; Schmidt, Karen K.; Muriello, Paul F.; Althouse, Sandra; Rawl, Susan M.	Providing Quantitative Information and a Nudge to Undergo Stool Testing in a Colorectal Cancer Screening Decision Aid: A Randomized Clinical Trial	Medical Decision Making	37	6	688-702	BACKGROUND: Guidelines recommend that patient decision aids should provide quantitative information about probabilities of potential outcomes, but the impact of this information is unknown. Behavioral economics suggests that patients confused by quantitative information could benefit from a "nudge" towards one option. We conducted a pilot randomized trial to estimate the effect sizes of presentin…	1	1	1	1	1	3,6	5
173	2017	Greenberg, Joshua; Dube, Eve; Driedger, Michelle	Vaccine Hesitancy: In Search of the Risk Communication Comfort Zone	PLoS Currents	9			INTRODUCTION: This paper reports the findings of a national online survey to parents of children aged 5 and younger. The objectives of the study were to assess parental understanding of childhood immunizations, identify sources of information that they trust for vaccine-related content, assess where parents with young children stand on the key issues in the public debate about vaccination, and id…	1	1	1	1	2	6	26
183	2017	Stubenrouch, Fabienne E.; Baumann, Marwin; Legemate, Dink A.; Ubbink, Dirk T.	A Web-Based Application to Communicate Benefits and Risks of Surgical Treatments	Surgical Technology International	30		31-37	BACKGROUND: In general, communication is an important aspect during surgeon-patient consultations. However, clear communication of the benefits and risks of the possible treatment options can be challenging. Visual presentation of information may increase patient comprehension. We developed and piloted a web-based application that provides graphical representations of the numerical benefits and r…	2	1	1	1,2	1	1	0
194	2017	Mendez, Diana H.; Buttner, Petra; Kelly, Jenny; Nowak, Madeleine; Speare Posthumously, Rick	Difficulties experienced by veterinarians when communicating about emerging zoonotic risks with animal owners: the case of Hendra virus	BMC Veterinary Research	13		56	BACKGROUND: Communication skills are essential for veterinarians who need to discuss animal health related matters with their clients. When dealing with an emerging zoonosis, such as Hendra virus (HeV), veterinarians also have a legal responsibility to inform their clients about the associated risks to human health. Here we report on part of a mixed methods study that examined the preparedness of…	1,2	1	1	1	1	1,3,6	2
199	2017	Prokhorov, Alexander V.; Machado, Tamara C.; Calabro, Karen S.; Vanderwater, Elizabeth A.; Vidrine, Damon J.; Pasch, Keryn P.; Marani, Salma K.; Buchberg, Meredith; Wagh, Aditya; Russell, Sophia C.; Czerniak, Katarzyna W.; Botello, Gabrielle C.; Dobbins, Mackenzie H.; Khalil, Georges E.; Perry, Cheryl L.	Developing mobile phone text messages for tobacco risk communication among college students: a mixed methods study	BMC Public Health	17		137	BACKGROUND: Engaging young adults for the purpose of communicating health risks associated with nicotine and tobacco use can be challenging since they comprise a population heavily targeted with appealing marketing by the evolving tobacco industry. The Food and Drug Administration seeks novel ways to effectively communicate risks to warn about using these products. This paper describes the first …	2	1	1	1	2	2	5
206	2017	Amoozegar, Jacqueline B.; Rupert, Douglas J.; Sullivan, Helen W.; O'Donoghue, Amie C.	Consumer confusion between prescription drug precautions and side effects	Patient Education and Counseling	100	6	1111-1119	OBJECTIVE: Multiple studies have identified consumers' difficulty correctly interpreting risk information provided about prescription drugs, whether in printed format or online. This study's purpose was to explore whether consumers can distinguish between prescription drug precautions and side effects presented on brand-name drug websites. METHODS: Participants (n=873) viewed fictitious drug webs…	1	1	1	1	1	1,3	3
211	2017	Narayan, Madhav; Jones, Jacqueline; Portalupi, Laura B.; McIlvennan, Colleen K.; Matlock, Daniel D.; Allen, Larry A.	Patient Perspectives on Communication of Individualized Survival Estimates in Heart Failure	Journal of Cardiac Failure	23	4	272-277	BACKGROUND: Despite the availability of validated risk scores for survival in heart failure (HF), individualized estimates are not typically provided directly to patients. METHODS AND RESULTS: We explored patient perspectives regarding conveyance of individualized Seattle Heart Failure Model (SHFM) survival estimates. In 2014 and 2015, 24 HF patients completed a semistructured interview at the in…	2	1	1	1	1	1,2,3,6	5
215	2017	Ohayon, Jennifer Liss; Cousins, Elicia; Brown, Phil; Morello-Frosch, Rachel; Brody, Julia Green	Researcher and institutional review board perspectives on the benefits and challenges of reporting back biomonitoring and environmental exposure results	Environmental Research	153		140-149	As the number of personal exposure studies expands and trends favor greater openness and transparency in the health sciences, ethical issues arise around reporting back individual results for contaminants without clear health guidelines. Past research demonstrates that research participants want their results even when the health implications are not known. The experiences of researchers and inst…	2	3	1	1	1	1,3,6	9
219	2017	Hakone, Anzu; Harrison, Lane; Ottley, Alvitta; Winters, Nathan; Gutheil, Caitlin; Han, Paul K. J.; Chang, Remco	PROACT: Iterative Design of a Patient-Centered Visualization for Effective Prostate Cancer Health Risk Communication	IEEE Transactions on Visualization and Computer Graphics	23	1	601-610	Prostate cancer is the most common cancer among men in the US, and yet most cases represent localized cancer for which the optimal treatment is unclear. Accumulating evidence suggests that the available treatment options, including surgery and conservative treatment, result in a similar prognosis for most men with localized prostate cancer. However, approximately 90% of patients choose surgery ov…	2	1	1	1	1	1,3	8
229	2017	Dawson, Ian G. J.; Johnson, Johnnie E. V.; Luke, Michelle A.	One Too Many? Understanding the Influence of Risk Factor Quantity on Perceptions of Risk	Risk Analysis	37	6	1157-1169	Forming a subjective risk judgment in circumstances that feature multiple risk factors is a common, yet complex task. One would expect variations in the number of risk factors in a given situation to have an important influence on risk judgments, yet the exact nature of this influence remains empirically untested. We conducted three studies to address this issue. In Study 1, we found that, when i…	1	7	1	1	2	3	0
239	2017	Fraenkel, Liana; Stolar, Marilyn; Swift, Sarah; Street, Richard L. Jr; Chowdhary, Harjinder; Peters, Ellen	Subjective Numeracy and the Influence of Order and Amount of Audible Information on Perceived Medication Value	Medical Decision Making	37	3	230-238	BACKGROUND: Order and amount of information influence patients' risk perceptions, but most studies have evaluated patients' reactions to written materials. The objective of this study was to examine the effect of 4 communication strategies, varying in their order and/or amount of information, on judgments related to an audible description of a new medication and among patients who varied in subje…	1	1	1	1	2	3	6
240	2017	Aikin, Kathryn J.; Southwell, Brian G.; Paquin, Ryan S.; Rupert, Douglas J.; O'Donoghue, Amie C.; Betts, Kevin R.; Lee, Philip K.	Correction of misleading information in prescription drug television advertising: The roles of advertisement similarity and time delay	Research in Social & Administrative Pharmacy : RSAP	13	2	378-388	BACKGROUND: Prescription drug television advertisements containing potentially consequential misinformation sometimes appear in the United States. When that happens, the U.S. Food and Drug Administration can request that companies distribute corrective advertisements to address misinformation and inaccurate claims. Previous research has demonstrated effectiveness in corrective advertising for var…	1	7	1	1	2	3,6	8
241	2017	Boehmert, Christoph; Wiedemann, Peter; Pye, Jonathon; Croft, Rodney	The Effects of Precautionary Messages about Electromagnetic Fields from Mobile Phones and Base Stations Revisited: The Role of Recipient Characteristics	Risk Analysis	37	3	583-597	Precautionary messages have been shown to increase recipients' threat perceptions about radio-frequency electromagnetic fields (RF-EMFs) emitted by mobile phones and mobile phone base stations. The current study explored the interplay of variables on the side of message recipients with this effect. The individual difference variables of interest were gender, trait anxiety, personal need for struc…	1	7	1	1	2	3	11
243	2017	Kreuzmair, Christina; Siegrist, Michael; Keller, Carmen	Does Iconicity in Pictographs Matter? The Influence of Iconicity and Numeracy on Information Processing, Decision Making, and Liking in an Eye-Tracking Study	Risk Analysis	37	3	546-556	Researchers recommend the use of pictographs in medical risk communication to improve people's risk comprehension and decision making. However, it is not yet clear whether the iconicity used in pictographs to convey risk information influences individuals' information processing and comprehension. In an eye-tracking experiment with participants from the general population (N = 188), we examined w…	1	1	1	1	2	1,2	7
251	2017	Zeliadt, Steven B.; Greene, Preston A.; Krebs, Paul; Klein, Deborah E.; Feemster, Laura C.; Au, David H.; Slatore, Christopher G.; Heffner, Jaimee L.	A proactive telephone-delivered risk communication intervention for smokers participating in lung cancer screening: A pilot feasibility trial	Journal of Smoking Cessation	Published online: 07 September 2017			Introduction: Many barriers exist to integrating smoking cessation into delivery of lung cancer screening including limited provider time and patient misconceptions. Aims: To demonstrate that proactive outreach from a telephone counsellor outside of the patient's usual care team is feasible and acceptable to patients. Methods: Smokers undergoing lung cancer screening were approached for a telepho…	1	1	1	1	1	2,6	1
254	2017	Viberg Johansson, Jennifer; Segerdahl, Pär; Ugander, Ulrika Hösterey; Hansson, Mats G.; Langenskiöld, Sophie	Making sense of genetic risk: A qualitative focus-group study of healthy participants in genomic research	Patient Education and Counseling	Epub 2017 Sep 18			OBJECTIVE: It is well known that research participants want to receive genetic risk information that is about high risks, serious diseases and potential preventive measures. The aim of this study was to explore, by qualitative means, something less well known: how do healthy research participants themselves make sense of genetic risk information? METHOD: A phenomenographic approach was chosen to …	2	1	1	1	1	1,3,6	2
255	2017	Bonner, Carissa; McKinn, Shannon; Lau, Annie; Jansen, Jesse; Doust, Jenny; Trevena, Lyndal; McCaffery, Kirsten	Heuristics and biases in cardiovascular disease prevention: How can we improve communication about risk, benefits and harms?	Patient Education and Counseling	Epub 2017 Dec 11			OBJECTIVE: Cardiovascular disease (CVD) prevention guidelines recommend medication based on the probability of a heart attack/stroke in the next 5–10 years. However, heuristics and biases make risk communication challenging for doctors. This study explored how patients interpret personalised CVD risk results presented in varying formats and timeframes. METHODS: GPs recruited 25 patients with CVD …	2	1	1	1	2	1,5,6	5
256	2017	Kim, Mikyoung; Choi, Yoonhyeung	Risk communication: The roles of message appeal and coping style	Social Behavior and Personality	45	5	773-784	We examined the main effect of message appeal (emotional and logical) and coping style (monitors and blunters) and the interaction effect between the two on risk message processing outcomes. Participants were 74 U.S. undergraduate and graduate students who read news stories about tornadoes, then rated their risk message processing outcomes. Results showed that emotional appeals led to a higher ri…	1	5	1	1	1	1,3	3
258	2017	Silarova, Barbora; Douglas, Fiona E.; Usher-Smith, Juliet A.; Godino, Job G.; Griffin, Simon J.	Risk accuracy of type 2 diabetes in middle aged adults: Associations with sociodemographic, clinical, psychological and behavioural factors	Patient Education and Counseling	Epub 2017 Jul 21			OBJECTIVE: To identify the proportion of individuals with an accurate perception of their risk of type 2 diabetes (T2D) prior to, immediately after and eight weeks after receiving a personalised risk estimate. Additionally, we aimed to explore what factors are associated with underestimation and overestimation immediately post-intervention. METHODS: Cohort study based on the data collected in the…	1	1	1	1	1	3	0
259	2017	Thomas, Jenifer J.; Moring, John C.; Baker, Samantha; Walker, Macey; Warino, Terra; Hobbs, Talisha; Lindt, Adara; Emerson, Tori	Do words matter? Health care providers’ use of the term prediabetes	Health, Risk & Society	19	5-6	301-315	Communication of risk is not solely the transfer of information; it is an interaction and exchange of ideas between concerned individuals. Health care provider communication about type 2 diabetes risk status may influence individual participation in behaviours that prevent or delay the disease, which is concerning from a public health perspective. The term prediabetes is used to convey risk statu…	2	1	1	1	1	1	0
260	2017	Chopra, Ishveen; Kelly, Kimberly M.	Cancer risk information sharing: The experience of individuals receiving genetic counseling for BRCA1/2 mutations	Journal of Health Communication	22	2	143-152	Genetic counseling and testing for familial cancer is a unique context for the communication of risk information in the family. This study utilized a theoretical framework based on the family systems perspective to understand intrafamilial cancer risk communication patterns in the Ashkenazi Jewish population. Individuals (n = 120) at an elevated risk for BRCA1/2 mutations were included. Change in…	1	1	1	1	1	6	0
262	2017	Garelik, Steven; Wang, X. T. (Xiao‐Tian)	Multiple framing: Verbal, facial, and vocal cues in risky choice	Journal of Behavioral Decision Making	30	2	322-331	Verbal framing effects have been widely studied, but little is known about how people react to multiple framing cues in risk communication, where verbal messages are often accompanied by facial and vocal cues. We examined joint and differential effects of verbal, facial, and vocal framing on risk preference in hypothetical monetary and life–death situations. In the multiple framing condition with…	1	7	1	1	1	6	1
265	2017	Brumbach, Barbara H.; Birmingham, Wendy C.; Boonyasiriwat, Watcharaporn; Walters, Scott; Kinney, Anita Y.	Intervention mediators in a randomized controlled trial to increase colonoscopy uptake among individuals at increased risk of familial colorectal cancer	Annals of Behavioral Medicine	51	5	694-706	BACKGROUND: Understanding the pathways by which interventions achieve behavioral change is important for optimizing intervention strategies. PURPOSE: We examined mediators of behavior change in a tailored-risk communication intervention that increased guideline-based colorectal cancer screening among individuals at increased familial risk. METHODS: Participants at increased familial risk for colo…	1	1	1	1	1	1,3,6	2
275	2017	Miller, Suzanne M.; Tagai, Erin K.; Wen, Kuang-Yi; Lee, Minsun; Hui, Siu-kuen Azor; Kurtz, Deirdre; Scarpato, John; Hernandez, Enrique	Predictors of adherence to follow-up recommendations after an abnormal Pap smear among underserved inner-city women	Patient Education and Counseling	100	7	1353-1359	Objectives: This study aimed to identify cognitive-affective predictors of adherence to initial diagnostic colposcopy and 6-month follow-up recommendations among underserved women. Methods: A secondary data analysis was completed of a randomized clinical trial assessing tailored telephone counseling for colposcopy adherence after an abnormal screening Pap smear among 210 underserved inner-city wo…	1	1	1	1	1	6,7	2
277	2017	So, Jiyeon; Jeong, Se-Hoon; Hwang, Yoori	Which type of risk information to use for whom? Moderating role of outcome-relevant involvement in the effects of statistical and exemplified risk information on risk perceptions	Journal of Health Communication	22	4	304-311	The extant empirical research examining the effectiveness of statistical and exemplar-based health information is largely inconsistent. Under the premise that the inconsistency may be due to an unacknowledged moderator (O’Keefe, 2002), this study examined a moderating role of outcome-relevant involvement (Johnson & Eagly, 1989) in the effects of statistical and exemplified risk information on ris…	1	1	1	1	2	3,6	5
278	2017	Stone, Eric R.; Bruine de Bruin, Wändi; Wilkins, Abigail M.; Boker, Emily M.; MacDonald Gibson, Jacqueline	Designing graphs to communicate risks: Understanding how the choice of graphical format influences decision making	Risk Analysis	37	4	612-628	Previous research suggests that the choice of graphical format for communicating risk information affects both understanding of the risk magnitude and the likelihood of acting to decrease risk. However, the mechanisms through which these effects work are poorly understood. To explore these mechanisms using a real-world scenario, we examined the relative impact of two graphical displays for depict…	1	7	1	1	2	1,2,3,6	9
280	2017	Guan, Yue; Roter, Debra L.; Erby, Lori H.; Wolff, Jennifer L.; Gitlin, Laura N.; Roberts, J. Scott; Green, Robert C.; Christensen, Kurt D.	Disclosing genetic risk of Alzheimer’s disease to cognitively impaired patients and visit companions: Findings from the REVEAL Study	Patient Education and Counseling	100	5	927-935	Objective: To describe the impact of genetic information on Alzheimer’s disease (AD) risk communication to patients with mild cognitive impairment (MCI) and their visit companions. Methods: Participants of the fourth REVEAL Study trial were randomized to receive AD risk assessments with or without genotype results. We coded 79 audio recorded risk disclosure sessions with the Roter Interaction Ana…	1	1	1	1,2	1	2	5
281	2017	Janssen, Eva; Ruiter, Robert A. C.; Waters, Erika A.	Combining risk communication strategies to simultaneously convey the risks of four diseases associated with physical inactivity to socio-demographically diverse populations	Journal of Behavioral Medicine	Epub 2017 Oct 13			A single risk factor can increase the risk of developing multiple diseases, but most risk communication research has been conducted in the context of a single disease. We explored which combination of three recommended risk communication strategies is most effective in simultaneously conveying risk estimates of four diseases associated with physical inactivity: colon cancer, stroke, diabetes, and…	1	1	1	1	2	1,3,6,7	6
284	2017	Engelhardt, Ellen G.; Pieterse, Arwen H.; Han, Paul K. J.; van Duijn-Bakker, Nanny; Cluitmans, Frans; Maartense, Ed; Bos, Monique M. E. M.; Weijl, Nir I.; Punt, Cornelis J. A.; van Ufford-Mannesse, Patricia Quarles; Sleeboom, Harm; Portielje, Johanneke E. A.; van der Hoeven, Koos J. M.; Woei-A-Jin, F. J. Sherida; Kroep, Judith R.; de Haes, Hanneke C. J. M.; Smets, Ellen M. A.; Stiggelbout, Anne M.	Disclosing the uncertainty associated with prognostic estimates in breast cancer: Current practices and patients’ perceptions of uncertainty	Medical Decision Making	37	3	179-192	Background: Treatment decision making is often guided by evidence-based probabilities, which may be presented to patients during consultations. These probabilities are intrinsically imperfect and embody 2 types of uncertainties: aleatory uncertainty arising from the unpredictability of future events and epistemic uncertainty arising from limitations in the reliability and accuracy of probability …	2	1	1	1	1	1	10
291	2017	Hilton, N. Zoe; Ham, Elke; Nunes, Kevin L.; Rodrigues, Nicole C.; Frank, Cairina; Seto, Michael C.	Using graphs to improve violence risk communication	Criminal Justice and Behavior	44	5	678-694	We examined the use of graphs as an aid to communicating statistical risk among forensic clinicians. We first tested four graphs previously used or recommended for forensic risk assessment among 442 undergraduate students who made security recommendations about two offenders whose risk differed by one actuarial category of risk for violent recidivism (Study 1). Effective decision making was defin…	1	7	1	1,2	2	6	4
293	2017	Armstrong, Bonnie; Spaniol, Julia	Experienced probabilities increase understanding of diagnostic test results in younger and older adults	Medical Decision Making	37	6	670-679	Background: With advancing age, the frequency of medical screening increases. Interpreting the results of medical tests involves estimation of posterior probabilities such as positive predictive values (PPVs) and negative predictive values (NPVs). Both laypeople and experts are typically poor at estimating posterior probabilities when the relevant statistics are communicated descriptively. The cu…	1	1	1	1	2	3	9
300	2016	Mabel stevenson; Brein JTaylor	Risk communication in dementia care: family perspectives	Journal of Risk Research	Published online: 30 Sep 2016			Family carers are often involved in decisions concerning the health and social care needs of people with dementia. These decisions frequently involve considering risks inherent in daily living situations and discussing these with care recipients and professionals. The purpose of this study is to understand the risks that present most concern to family carers; explore attitudes and approaches of t…	2	1	1	1,2	1	4,6,7	7
303	2016	Kai kuang; Hyuni Cho	Delivering vaccination messages via interactive channels: examining the interaction among threat, response efficacy, and interactivity in risk communication	Journal of Risk Research	19	4	476-495	New media-based interactive risk communication has gained increasing attention and importance. While extant research has focused on the main effects of interactivity on attitudinal and behavioral outcomes, little research has investigated how risk message content may interact with risk message modality such as interactivity in generating effects, or the psychological processes underlying it. In t…	1	1	1	1	2	3,6	3
304	2016	Melanie De Vocht; An-Sofie Claeys; Verolien Cauberghe; Mieke Uyttendaele; Benedikt Sas	Won’t we scare them? The impact of communicating uncontrollable risks on the public’s perception	Journal of Risk Research	19	3	316-330	Authorities often refrain from communicating risks out of fear to arouse negative feelings amongst the public and to create negative reactions in terms of the public’s behavior. This study examines the impact of communicating risks on the public’s feelings and behavioral intentions regarding an uncontrollable risk related to fresh produce. In addition, the impact of risk communication is compared…	1	2	1,2	1	2	3,5,6	21
306	2016	Rui Gaspar; Sílvia Luís; Beate Seibt; Maria Luísa Lima; Afrodita Marcu; Pieter Rutsaert; Dave Fletcher; Wim Verbeke; Julie Barnett	Consumers’ avoidance of information on red meat risks: information exposure effects on attitudes and perceived knowledge	Journal of Risk Research	19	4	533-549	In accordance with cognitive dissonance theory, individuals generally avoid information that is not consistent with their cognitions, to avoid psychological discomfort associated with tensions arising from contradictory beliefs. Information avoidance may thus make risk communication less successful. To address this, we presented information on red meat risks to red meat consumers. To explore info…	1	2	1	1	2	1,3	16
310	2016	Licia Ravarotto; Stefania Crovato ; Claudio Mantovani ; Fabiano D,Este; Anna Pinto and Giulia Mascarello	Reducing microbiological risk in the kitchen: piloting consensus conference methodology as a communication strategy	Journal of Risk Research	19	7	934-950	Foodborne diseases are a major public health problem. Improper storage and food preparation at home can favour microbial contamination of food. Consumers play a crucial role in controlling this risk. To reduce exposure to risk, it is essential to provide information and guidance on contamination management in the home. The aim of this study was to pilot a method of participatory communication add…	1	2	1	1	2	2	16
316	2016	Haer, Toon; Botzen, W. J. Wouter; Aerts, Jeroen C. J. H.	The effectiveness of flood risk communication strategies and the influence of social networks—Insights from an agent-based model	Environmental Science & Policy	60		44-52	Abstract Flood risk management is becoming increasingly important, because more people are settling in flood-prone areas, and flood risk is increasing in many regions due to extreme weather events associated with climate change. It has been proposed that appropriately designed flood risk communication campaigns can stimulate floodplain inhabitants to prepare for flooding, and encourage adaptation…	3	5	1	1	1,2	6	36
324	2016	Aenishaenslin, Cécile; Bouchard, Catherine; Koffi, Jules K.; Pelcat, Yann; Ogden, Nicholas H.	Evidence of rapid changes in Lyme disease awareness in Canada	Ticks and Tick-borne Diseases	7	6	1067-1074	Abstract Lyme disease (LD) is emerging in Canada. A key preventive strategy is promoting the adoption by the general public of personal preventive behaviors regarding tick bites. The aim of this study was to measure the changes in public awareness toward ticks and {LD} before and after the launch of a national communication campaign in Canada using data from two surveys conducted in March and Dec…	1	1	1	1	2	1	9
366	2016	Sawant, Ruta V.; Beatty, Collin R.; Sansgiry, Sujit S.	Effect of Communication Style on Perceptions of Medication Side Effect Risk among Pharmacy Students	American Journal of Pharmaceutical Education	80	8	131	Objective. To assess the effect of communication style, and frequency and severity of medication side-effects, on pharmacy students' perception of risk of experiencing side effects. Methods. One hundred responses from pharmacy students were obtained using an online survey. Participants were presented with a drug information box containing drug name, drug usage, and one side-effect associated with…	1	1	1	2	1	3	0
368	2016	Wang, Catharine; Gordon, Erynn S.; Norkunas, Tricia; Wawak, Lisa; Liu, Ching-Ti; Winter, Michael; Kasper, Rachel S.; Christman, Michael F.; Green, Robert C.; Bowen, Deborah J.	A randomized trial Examining The Impact Of Communicating Genetic And Lifestyle Risks For Obesity	Obesity (Silver Spring, Md)	24	12	2481-2490	OBJECTIVE: Genetic testing for obesity is available directly to consumers, yet little is understood about its behavioral impact and its added value to nongenetic risk communication efforts based on lifestyle factors. METHODS: A randomized trial examined the short-term impact of providing personalized obesity risk information, using a 2 x 2 factorial design. Participants were recruited from the Co…	1	1	1	2	1	6	4
372	2016	Murakami, Michio; Nakatani, Jun; Oki, Taikan	Evaluation of Risk Perception and Risk-Comparison Information Regarding Dietary Radionuclides after the 2011 Fukushima Nuclear Power Plant Accident	PLoS One	11	11	e0165594	In the wake of the 2011 Fukushima Daiichi Nuclear Power Station accident, to facilitate evidence-based risk communication we need to understand radiation risk perception and the effectiveness of risk-comparison information. We measured and characterized perceptions of dread risks and unknown risks regarding dietary radionuclides in residents of Fukushima, Tokyo, and Osaka to identify the primary …	1	2,4	3	1	2	1,3,5	15
381	2016	Miller, Michael J.; Weech-Maldonado, Robert; Outman, Ryan C.; Ray, Midge N.; Gary, Lisa C.; Chen, Lang; Cobaugh, Daniel J.; Allison, Jeroan J.; Saag, Kenneth G.	Evaluating the effectiveness of a patient storytelling DVD intervention to encourage physician-patient communication about nonsteroidal anti-inflammatory drug (NSAID) use	Patient Education and Counseling	99	11	1837-1844	OBJECTIVE: To evaluate the effectiveness of a culturally-sensitive, patient storytelling intervention to enhance physician-patient communication about NSAID risk. METHODS: A group randomized trial of 40 medical practices in Alabama was conducted. Patients within intervention practices received a 13-minute DVD that included patient stories related to their experiences with NSAIDs, adverse effects,…	1	1	1	1	1	6	4
382	2016	Boehmert, Christoph; Wiedemann, Peter; Croft, Rodney	Improving Precautionary Communication in the EMF Field? Effects of Making Messages Consistent and Explaining the Effectiveness of Precautions	International Journal of Environmental Research and Public Health	13	10	992	Many radiation health agencies communicate precautionary measures regarding the use of mobile communication devices, e.g. the use of a headset while talking on the phone. These precautionary messages have, however, been shown to unintentionally increase risk perceptions about radiofrequency electromagnetic fields (RF-EMFs). The current study tested two potential ways of amending precautionary mes…	1	1	1	1	2	3	6
394	2016	Hino, Yuko; Murakami, Michio; Midorikawa, Sanae; Ohtsuru, Akira; Suzuki, Shinichi; Tsuboi, Kumiko; Ohira, Tetsuya	Explanatory Meetings on Thyroid Examination for the "Fukushima Health Management Survey" after the Great East Japan Earthquake: Reduction of Anxiety and Improvement of Comprehension	The Tohoku Journal of Experimental Medicine	239	4	333-343	After the Fukushima Daiichi nuclear accident in 2011 and thyroid examinations of children in Fukushima, the Radiation Medical Science Center began "Explanatory meetings on thyroid examination" as a method of communication with residents such as the subjects themselves and their guardians. Through questionnaires, we examined the relationship between anxiety (regarding the effects of radiation on t…	1	1	3	1	2	1,2,3	17
400	2016	Khalil, Georges Elias; Beale, Ivan L.; Chen, Minxing; Prokhorov, Alexander V.	A Video Game Promoting Cancer Risk Perception and Information Seeking Behavior Among Young-Adult College Students: A Randomized Controlled Trial	JMIR Serious Games	4	2	e13	BACKGROUND: Risky behaviors tend to increase drastically during the transition into young adulthood. This increase may ultimately facilitate the initiation of carcinogenic processes at a young age, highlighting a serious public health problem. By promoting information seeking behavior (ISB), young adults may become aware of cancer risks and potentially take preventive measures.OBJECTIVE: Based on…	1	1	1	1	2	3,6	0
402	2016	Blalock, Susan J.; Sage, Adam; Bitonti, Michael; Patel, Payal; Dickinson, Rebecca; Knapp, Peter	Communicating information concerning potential medication harms and benefits: What gist do numbers convey?	Patient Education and Counseling	99	12	1964-1970	OBJECTIVES: Fuzzy trace theory was used to examine the effect of information concerning medication benefits and side-effects on willingness to use a hypothetical medication. METHODS: Participants (N=999) were recruited via Amazon Mechanical Turk. Using 3x5 experimental research design, each participant viewed information about medication side effects in 1 of 3 formats and information about medica…	1	1	1	1	2	6	4
408	2016	Wackowski, Olivia A.; Hammond, David; O'Connor, Richard J.; Strasser, Andrew A.; Delnevo, Cristine D.	Smokers' and E-Cigarette Users' Perceptions about E-Cigarette Warning Statements	International Journal of Environmental Research and Public Health	13	7	655	Cigarette warning labels are important sources of risk information, but warning research for other tobacco products is limited. This study aimed to gauge perceptions about warnings that may be used for e-cigarettes. We conducted six small focus groups in late 2014/early 2015 with adult current e-cigarette users and cigarette-only smokers. Participants rated and discussed their perceptions of six …	1,2	1	1	1	2	2,6	23
426	2016	Bass, Sarah Bauerle; Gordon, Thomas F.; Gordon, Ryan; Parvanta, Claudia	Using eye tracking and gaze pattern analysis to test a "dirty bomb" decision aid in a pilot RCT in urban adults with limited literacy	BMC Medical Informatics and Decision Making	16		67	BACKGROUND: Eye tracking is commonly used in marketing to understand complex responses to materials, but has not been used to understand how low-literacy adults access health information or its relationship to decision making. METHODS: This study assessed how participants use a literacy appropriate "dirty bomb" decision aid. Participants were randomized to receive a CDC "factsheet" (n = 21) or li…	1	7	1	1	2	1	5
438	2016	Seitz, Holli H.; Gibson, Laura; Skubisz, Christine; Forquer, Heather; Mello, Susan; Schapira, Marilyn M.; Armstrong, Katrina; Cappella, Joseph N.	Effects of a risk-based online mammography intervention on accuracy of perceived risk and mammography intentions	Patient Education and Counseling	99	10	1647-1656	OBJECTIVE: This experiment tested the effects of an individualized risk-based online mammography decision intervention. The intervention employs exemplification theory and the Elaboration Likelihood Model of persuasion to improve the match between breast cancer risk and mammography intentions.METHODS: 2918 women ages 35-49 were stratified into two levels of 10-year breast cancer risk (<1.5%; ≥1.5…	1	1	1	1	1	3,6	9
440	2016	Van Wagner, Vicki	Risk talk: Using evidence without increasing fear	Midwifery	38		21-28	OBJECTIVE: this paper explores unexpected findings about how to "do risk talk" which emerged during a broader research project on of the application and misapplication of evidence-based practice in Canada. DESIGN: the study used qualitative methods such as semi-structured interviews and thematic analysis of inter-professional maternity care conference presentations. SETTING: Canada PARTICIPANTS: …	2	1	1	2	1	3	10
443	2016	Mowbray, Fiona; Marcu, Afrodita; Godinho, Cristina A.; Michie, Susan; Yardley, Lucy	Communicating to increase public uptake of pandemic flu vaccination in the UK: Which messages work?	Vaccine	34	28	3268-3274	BACKGROUND: Vaccination is considered the most effective preventive measure against influenza transmission, yet vaccination rates during the 2009/10 influenza A/H1N1 pandemic were low across the world, with the majority of people declining to receive the vaccine. Despite extensive research on the predictors of uptake of influenza vaccination, little research has focused on testing the effectivene…	2	1	1	1	2	2,5	4
445	2016	Robillard, Alyssa G.; Holliday, Rhonda C.; DeHart, Dana D.; Lewis, Kaleea; Rutherford, Yamisha; Amutah, Ndidi N.	An Exploratory Study Examining Risk Communication among Adolescent Children, Their Incarcerated Mothers, and Their Caregivers	Journal of Health Care for the Poor and Underserved	27	2	101-119	Adolescent children of incarcerated mothers (ACIM) are typically left in the care of adults (primary caregivers) who play a crucial role in children's care and guidance, as well as in the facilitation of contact and communication with incarcerated mothers. The purpose of this study was to explore the nature of relationships and communication among adolescent children of incarcerated mothers, prim…	2	7	1	1	1	6	0
456	2016	Han, Paul K. J.; Dieckmann, Nathan F.; Holt, Christina; Gutheil, Caitlin; Peters, Ellen	Factors Affecting Physicians' Intentions to Communicate Personalized Prognostic Information to Cancer Patients at the End of Life: An Experimental Vignette Study	Medical Decision Making	36	6	703-713	PURPOSE: To explore the effects of personalized prognostic information on physicians' intentions to communicate prognosis to cancer patients at the end of life, and to identify factors that moderate these effects.METHODS: A factorial experiment was conducted in which 93 family medicine physicians were presented with a hypothetical vignette depicting an end-stage gastric cancer patient seeking pro…	1	1	1	2	1	8	5
460	2016	Krishnamurti, Tamar; Argo, Nichole	A Patient-Centered Approach to Informed Consent: Results from a Survey and Randomized Trial	Medical Decision Making	36	6	726-740	PURPOSE: Traditional informed consent documents tend to be too lengthy and technical to facilitate proper patient engagement. Patient-centered, short informed consent content could be equally informative, while minimizing patient burden and producing greater patient engagement. This study aimed to develop and evaluate patient-centered, patient-designed paper and video informed consent formats. ME…	1	1	1	1	1	1,5,6	9
470	2016	Garcia-Retamero, Rocio; Cokely, Edward T.; Wicki, Barbara; Joeris, Alexander	Improving risk literacy in surgeons	Patient Education and Counseling	99	7	1156-1161	OBJECTIVE: To effectively practice evidence-based medicine, surgeons need to understand and be able to communicate health-relevant numerical information. We present the first study examining risk literacy in surgeons by assessing numeracy and surgical risk comprehension. Our study also investigated whether visual aids improve risk comprehension in surgeons with limited numeracy. METHODS: Particip…	1	1	1	2	2	1,3	17
475	2016	Sladakovic, Jovana; Jansen, Jesse; Hersch, Jolyn; Turner, Robin; McCaffery, Kirsten	The differential effects of presenting uncertainty around benefits and harms on treatment decision making	Patient Education and Counseling	99	6	974-980	OBJECTIVE: The study aimed to determine the effects of presenting uncertainty of quantitative risk information about medication harms and benefits on intention to take medication and psychosocial outcomes.METHODS: 147 participants were randomized into four hypothetical scenarios: (1) harm/benefit presented as point-estimates, (2) harm as point/benefit as range, (3) harm as range/benefit as point,…	1	1	1	1	1	1,3,6	4
478	2016	Kreuzmair, Christina; Siegrist, Michael; Keller, Carmen	High Numerates Count Icons and Low Numerates Process Large Areas in Pictographs: Results of an Eye-Tracking Study	Risk Analysis	36	8	1599-1614	In two experiments, we investigated the influence of numeracy on individuals' information processing of pictographs depending on numeracy via an eye-tracker. In two conditions, participants from the general population were presented with a scenario depicting the risk of having cancer and were asked to indicate their perceived risk. The risk level was high (63%) in experiment 1 (N = 70) and low (6…	1	1	1	1	1	1,3	12
484	2016	Cezar-Vaz, Marta Regina; Bonow, Clarice Alves; da Silva, Mara Regina Santos; de Farias, Francisca Lucelia Ribeiro; de Almeida, Marlise Capa Verde	The Use of Illegal Drugs and Infectious Contagious Diseases: Knowledge and Intervention among Dockworkers	International Journal of Environmental Research and Public Health	13	1	125	This study's objective was to analyze the use of illegal drugs by dockworkers and provide risk communication regarding the use of illegal drugs and test for infectious contagious diseases among dockworkers. This cross-sectional study including an intervention addressed to 232 dockworkers, who were individually interviewed, as well as communication of risk with testing for infectious contagious di…	2	1	1	2	2	6	5
489	2016	Yang, Z. Janet	Altruism During Ebola: Risk Perception, Issue Salience, Cultural Cognition, and Information Processing	Risk Analysis	36	6	1079-1089	A nationally representative sample of 1,046 U.S. adults was randomly assigned to two experimental conditions that triggered different degrees of risk perception related to the Ebola outbreak. In the high-risk condition, issue salience and deliberate processing increased individuals' altruistic behavioral intention. In contrast, cultural cognition worldview and negative emotions such as sadness an…	1	1	2	1	2	6	12
498	2016	Ottley, Alvitta; Peck, Evan M.; Harrison, Lane T.; Afergan, Daniel; Ziemkiewicz, Caroline; Taylor, Holly A.; Han, Paul K. J.; Chang, Remco	Improving Bayesian Reasoning: The Effects of Phrasing, Visualization, and Spatial Ability	IEEE Transactions on Visualization and Computer Graphics	22	1	529-538	Decades of research have repeatedly shown that people perform poorly at estimating and understanding conditional probabilities that are inherent in Bayesian reasoning problems. Yet in the medical domain, both physicians and patients make daily, life-critical judgments based on conditional probability. Although there have been a number of attempts to develop more effective ways to facilitate Bayes…	1	1	1	1	2	1	30
502	2016	Shenhar, Gilead; Rozenfeld, Michael; Radomislensky, Irina; Peleg, Kobi	Comparison of Two Successive Earthquake Awareness Campaigns in Israel: Improved Methodology or a Cumulative Effect?	Disaster Medicine and Public Health Preparedness	10	1	74-79	OBJECTIVES: An effective way to reduce casualties from earthquakes is to increase population preparedness. During 2011 to 2013, Israeli authorities executed 3 national-level earthquake awareness campaigns. We aimed to assess the impact of these campaigns on the populace and the ability of the campaigns to produce a cumulative effect throughout the study period. METHODS: Two surveys were conducted…	1	5	1	1	2	1,5,8	0
503	2016	Rolison, Jonathan J.; Morsanyi, Kinga; O'Connor, Patrick A.	Can I Count on Getting Better? Association between Math Anxiety and Poorer Understanding of Medical Risk Reductions	Medical Decision Making	36	7	876-886	BACKGROUND: Lower numerical ability is associated with poorer understanding of health statistics, such as risk reductions of medical treatment. For many people, despite good numeracy skills, math provokes anxiety that impedes an ability to evaluate numerical information. Math-anxious individuals also report less confidence in their ability to perform math tasks. We hypothesized that, independent …	1	1	1	1	2	1	10
508	2016	Damman, Olga C.; Bogaerts, Nina M. M.; van Dongen, Diana; Timmermans, Danielle R. M.	Barriers in using cardiometabolic risk information among consumers with low health literacy	British Journal of Health Psychology	21	1	135-156	OBJECTIVES: To identify the barriers from the perspective of consumers with low health literacy in using risk information as provided in cardiometabolic risk assessments.DESIGN: A qualitative thematic approach using cognitive interviews was employed.METHODS: We performed interviews with 23 people with low health literacy/health numeracy, who were recruited through (1) several organisations and sn…	2	1	1	1	1	1,2,6	8
519	2016	Tian, Xiangyang; Zhao, Genming; Cao, Dequan; Wang, Duoquan; Wang, Liang	Health education and promotion at the site of an emergency: experience from the Chinese Wenchuan earthquake response	Global Health Promotion	23	1	15-26	Theories and strategies of social mobilization, capacity building, mass and interpersonal communication, as well as risk communication and behavioral change were used to develop health education and promotion campaigns to decrease and prevent injuries and infectious diseases among the survivors of the Wenchuan earthquake in May 2008. We evaluated the effectiveness of the campaigns and short-term …	1	5	3	1	2	1,6	6
521	2016	Tong, Vivien; Raynor, David K.; Blalock, Susan J.; Aslani, Parisa	Exploring consumer opinions on the presentation of side-effects information in Australian Consumer Medicine Information leaflets	Health Expectations: An International Journal of Public Participation in Health Care & Health Policy	19	3	543-556	BACKGROUND: Consumer Medicine Information (CMI) is a brand-specific and standardized source of written medicine information available in Australia for all prescription medicines. Side-effect information is poorly presented in CMI and may not adequately address consumer information needs. OBJECTIVE: To explore consumer opinions on (i) the presentation of side-effect information in existing Austral…	2	1	1	1	2	1	11
523	2016	Cole, Galen E.; Keller, Punam A.; Reynolds, Jennifer; Schaur, Michelle; Krause, Diane	CDC MessageWorks: Designing and validating a social marketing tool to craft and defend effective messages	Social Marketing Quarterly	22	1	3-18	The Centers for Disease Control and Prevention’s Division of Cancer Prevention and Control, in partnership with Oak Ridge Associated Universities, designed an online social marketing strategy tool, MessageWorks, to help health communicators effectively formulate messages aimed at changing health behaviors and evaluate message tactics and audience characteristics. MessageWorks is based on the advi…	1	7	1	1	2	3,6	4
528	2016	Joo (Grace) Ahn, Sun	Virtual Exemplars in Health Promotion Campaigns: Heightening Perceived Risk and Involvement to Reduce Soft Drink Consumption in Young Adults	Journal of Media Psychology: Theories, Methods, and Applications	Published 2016			Virtual simulations allow individuals to concretely view the future negative health consequences of present dietary choices. Integrating exemplification theory with risk communication research, the effect of using virtual simulations to exemplify the health risks of soft drink consumption was assessed across 3 weeks. A three-group pretest, posttest, and delayed posttest design (N = 62) compared t…	1	1	1	1	2	3,6	4
534	2016	Fahlquist, Jessica Nihlén	Experience of non-breastfeeding mothers: Norms and ethically responsible risk communication	Nursing Ethics	23	2	231-241	Background: Breastfeeding is currently strongly recommended by midwives and paediatricians, and the recommendations are based on documents provided by the World Health Organization and public health authorities worldwide. Research question: The underlying question is, how are non-breastfeeding mothers affected emotionally when informed that breastfeeding is the safest and healthiest option? Resea…	2	1	1	1	2	3,4,7	17
537	2016	Tonkin, Emma; Coveney, John; Meyer, Samantha B.; Wilson, Annabelle M.; Webb, Trevor	Managing uncertainty about food risks—Consumer use of food labelling	Appetite	107		242-252	General consumer knowledge of and engagement with the production of food has declined resulting in increasing consumer uncertainty about, and sensitivity to, food risks. Emphasis is therefore placed on providing information for consumers to reduce information asymmetry regarding food risks, particularly through food labelling. This study examines the role of food labelling in influencing consumer…	2	2	1	1	2	3	11
538	2016	Franklin, Lyndsey; Plaisant, Catherine; Rahman, Kazi Minhazur; Shneiderman, Ben	TreatmentExplorer: An interactive decision aid for medical risk communication and treatment exploration	Interacting with Computers	28	3	238-252	Medical treatments carry unique benefits and risks which patients must understand in order to decide which option is best for them. Prior research has demonstrated that patients are ill-equipped to understand the statistical information presented to them through standard decision aids. We describe a prototype decision aid, TreatmentExplorer, which supports patients’ needs by presenting treatment …	1	1	1	1	2	1,2	11
539	2016	Idoiaga, Nahia; De Montes, Lorena Gil; Valencia, José-Francisco	Communication and representation of risk in health crises: The influence of framing and group identity	Revista de Psicología Social	31	1	59-74	Based on the Social Representations Theory (SRT) applied to the social construction of risk and the role played by group identities, this study examines the construction of risk created by the mass media in health epidemics. An experimental design with split-ballot questionnaire and 319 participants was used in which message framing (human interest vs. attribution of responsibility) and proximity…	1	1	1	1	2	3	1
543	2016	Smit, Amelia K.; Keogh, Louise A.; Hersch, Jolyn; Newson, Ainsley J.; Butow, Phyllis; Williams, Gabrielle; Cust, Anne E.	Public preferences for communicating personal genomic risk information: A focus group study	Health Expectations: An International Journal of Public Participation in Health Care & Health Policy	19	6	1203-1214	Background: Personalized genomic risk information has the potential to motivate behaviour change and promote population health, but the success of this will depend upon effective risk communication strategies. Objective: To determine preferences for different graphical and written risk communication formats, and the delivery of genomic risk information including the mode of communication and the …	2	1	1	1	1	1,2	18
545	2016	Hart, Sarah J.; Schoch, Kelly; Shashi, Vandana; Callanan, Nancy	Communication of psychiatric risk in 22q112 deletion syndrome: A pilot project	Journal of Genetic Counseling	25	1	6-17	Individuals with 22q11.2 deletion syndrome (22q11.2DS) have an increased chance of developing a psychiatric disorder. While parents of children affected by 22q11.2DS typically receive counseling about risk for non-psychiatric health concerns, genetic counselors may be reluctant to discuss psychiatric risk. Further education of genetic counselors may be necessary to encourage discussion of psychia…	2	1	1	2	1	1,4,6	2
547	2016	Rowland, Emma; Plumridge, Gill; Considine, Anna-Marie; Metcalfe, Alison	Preparing young people for future decision-making about cancer risk in families affected or at risk from hereditary breast cancer: A qualitative interview study	European Journal of Oncology Nursing	25		9-15	Purpose: Women carrying the mutated BRCA gene, have approximately an 80% life-time risk of developing breast cancer with 50% risk of their children inheriting the gene mutation. Many parents find it difficult to know when and how to disclose this information to their children and how such disclosure might affect their child's future decision-making. Method: This study explored the communication o…	2	1	1	1	1	3,6	6
549	2016	Napper, Lucy E.; Froidevaux, Nicole M.; LaBrie, Joseph W.	Being blunt about marijuana: Parent communication about marijuana with their emerging adult children	Prevention Science	17	7	882-891	While research suggests that parents continue to influence students’ marijuana use after matriculation to college, there is limited data examining how parents communicate about marijuana use and what impact parent marijuana communication has on college student outcomes. The aim of the current study is to investigate the types of parent marijuana messages that college students receive and the rela…	1	1	1	1	1	6	3
552	2016	Polak, Louisa	Current conditions or future risks: Certainty and uncertainty in decisions about statins	Health, Risk & Society	18	3-4	153-167	Preventive medications such as statins are recommended to an increasingly large number of people. To those who make these recommendations, prevention is synonymous with risk reduction; the clinical task of helping people decide about preventive medication is therefore widely framed as one of risk communication. In this article, I explore the role of risk and uncertainty in accounts of medication …	2	1	1	1	1	3,6	5
554	2016	Spence, Patric R.; Sellnow-Richmond, Deborah D.; Sellnow, Timothy L.; Lachlan, Kenneth A.	Social media and corporate reputation during crises: The viability of video-sharing websites for providing counter-messages to traditional broadcast news	Journal of Applied Communication Research	44	3	199-215	Exemplification, or the use of highly emotional and arousing messages to elicit responses based on impression formation, has been shown to influence perceptions of events, individuals, and organizations. News coverage concerning the use of lean finely textured beef (LFTB) is one such example, and anecdotal evidence suggests that this coverage may have had a negative impact on public perception of…	1	2	1	1	2	3,5,6	8
556	2016	Poortvliet, P. Marijn; Lokhorst, Anne Marike	The key role of experiential uncertainty when dealing with risks: Its relationships with demand for regulation and institutional trust	Risk Analysis	36	8	1615-1629	The results of a survey and an experiment show that experiential uncertainty—people's experience of uncertainty in risk contexts—plays a moderating role in individuals’ risk‐related demand for government regulation and trust in risk‐managing government institutions. First, descriptions of risks were presented to respondents in a survey (N = 1,017) and their reactions to questions about experienti…	1	7	1	1	2	3,5	6
557	2016	Siren, Reijo; Eriksson, Johan G.; Vanhanen, Hannu	Observed changes in cardiovascular risk factors among high-risk middle-aged men who received lifestyle counselling: A 5-year follow-up	Scandinavian Journal of Primary Health Care	34	4	336-342	Objective: To examine the long-term impact of health counselling among middle-aged men at high risk of CVD. Design: An observational study with a 5-year follow-up. Setting and intervention: All men aged 40 years in Helsinki have been invited to a visit to evaluate CVD risk from 2006 onwards. A modified version of the North Karelia project risk tool (CVD risk score) served to assess the risk. High…	1	1	1	1	1	6,8	1
559	2016	Swartling, Ulrica; Lynch, Kristian; Smith, Laura; Johnson, Suzanne Bennett	Parental estimation of their child’s increased type 1 diabetes risk during the first 2 years of participation in an international observational study: Results from the TEDDY study	Journal of Empirical Research on Human Research Ethics	11	2	106-114	This study assessed mothers’ and fathers’ perception of their child’s risk of getting type 1 diabetes (T1D) during the first 2 years of their participation in The Environmental Determinants of Diabetes in the Young (TEDDY) study. TEDDY parents were informed of their child’s increased genetic risk for T1D at study inception. Parent perception of the child’s risk was assessed at 3, 6, 15, and 27 mo…	1	1	1	1	1	3	2
562	2016	Blalock, Susan J.; DeVellis, Robert F.; Chewning, Betty; Sleath, Betsy L.; Reyna, Valerie F.	Gist and verbatim communication concerning medication risks/benefits	Patient Education and Counseling	99	6	988-994	Objectives: To describe the information about medication risks/benefits that rheumatologists provide during patient office visits, the gist that patients with rheumatoid arthritis (RA) extract from the information provided, and the relationship between communication and medication satisfaction. Methods: Data from 169 RA patients were analyzed. Each participant had up to three visits audiotaped. F…	1	1	1	1	1	8	2
564	2016	Pickett, Justin T.; Loughran, Thomas A.; Bushway, Shawn	Consequences of legal risk communication for sanction perception updating and white-collar criminality	Journal of Experimental Criminology	12	1	75-104	Objectives: Scholars have long emphasized that communicating, or “advertising”, information about legal sanction risk is necessary for the success of deterrence-based crime policies. However, scant research has evaluated whether direct communications about legal risk can cause sanction perception updating, the updating of ambiguity in sanction perceptions, or changes in persons’ willingness to of…	1	7	1	1	2	3	17
569	2016	Fraenkel, Liana; Peters, Ellen; Tyra, Shea; Oelberg, David	Shared medical decision making in lung cancer screening: Experienced versus descriptive risk formats	Medical Decision Making	36	4	518-525	Background: Annual lung cancer screening using low-dose computed tomography (LDCT) scans is associated with a survival benefit, but it is also associated with potential harm. Unlike descriptive probability formats, experienced tasks have been shown to decrease perceptions of rare events. The objective of this study was to compare descriptive versus experienced probability formats on patients’ kno…	1	1	1	1	2	1,3,6	12
573	2016	Knapp, Peter; Gardner, Peter H.; Woolf, Elizabeth	Combined verbal and numerical expressions increase perceived risk of medicine side‐effects: A randomized controlled trial of ema recommendations	Health Expectations: An International Journal of Public Participation in Health Care & Health Policy	19	2	264-274	Background: The study evaluated European Medicines Agency (EMA) recommendations on communicating frequency information on side‐effect risk. Methods: The study used a 2 × 2 factorial trial, with random allocation of information about 10 side‐effects of paclitaxel (Taxol) expressed using one of four formats. Recruitment was via the CancerHelpUK website. Information was conveyed using numerical freq…	1	1	1	1	1	2,3,6	15
575	2016	Mello, Susan; Hornik, Robert C.	Media coverage of pediatric environmental health risks and its effects on mothers’ protective behaviors	Risk Analysis	36	3	605-622	This study explores the relationship between exposure to U.S. media coverage of chemical threats to pediatric environmental health and mothers’ behaviors to protect their children. Prior content analytic work revealed that media coverage volume from September 2012 to February 2013 differed significantly by type of chemical (i.e., pesticides = high coverage volume; bisphenol A [BPA] = moderate; an…	1	3	1	1	2	6	3
577	2016	Klein, Krystal A.; Watson, Lindsey; Ash, Joan S.; Eden, Karen B.	Evaluation of risk communication in a mammography patient decision aid	Patient Education and Counseling	99	7	1240-1248	Objectives: We characterized patients’ comprehension, memory, and impressions of risk communication messages in a patient decision aid (PtDA), Mammopad, and clarified perceived importance of numeric risk information in medical decision making. Methods: Participants were 75 women in their forties with average risk factors for breast cancer. We used mixed methods, comprising a risk estimation probl…	1,2	1	1	1	1	1	5
578	2016	Barnes, Andrew J.; Hanoch, Yaniv; Miron-Shatz, Talya; Ozanne, Elissa M.	Tailoring risk communication to improve comprehension: Do patient preferences help or hurt?	Health Psychology	35	9	1007-1016	Objective: Risk communication tools can facilitate patients’ understanding of risk information. In this novel study, we examine the hypothesis that risk communication methods tailored to individuals’ preferences can increase risk comprehension. Method: Preferences for breast cancer risk formats, and risk comprehension理解力 data were collected using an online survey from 361 women at high risk for b…	1	1	1	1	2	1,2	6
588	2015	Bal, Gökhan; Rannenberg, Kai; Hong, Jason I.	Styx: Privacy risk communication for the Android smartphone platform based on apps' data-access behavior patterns	Computers & Security	53		187-202	Abstract Modern smartphone platforms offer a multitude of useful features to their users but at the same time they are highly privacy affecting. However, smartphone platforms are not effective in properly communicating privacy risks to their users. Furthermore, common privacy risk communication approaches in smartphone app ecosystems do not consider the actual data-access behavior of individual a…	1	7	1	1	2	3	7
608	2015	Exley, Karen; Cano, Noemi; Aerts, Dominique; Biot, Pierre; Casteleyn, Ludwine; Kolossa-Gehring, Marike; Schwedler, Gerda; Castaño, Argelia; Angerer, Jürgen; Koch, Holger M.; Esteban, Marta; Schoeters, Greet; Hond, Elly Den; Horvat, Milena; Bloemen, Louis; Knudsen, Lisbeth E.; Joas, Reinhard; Joas, Anke; Dewolf, Marie-Christine; Mieroop, Els Van de; Katsonouri, Andromachi; Hadjipanayis, Adamos; Ce…	Communication in a Human biomonitoring study: Focus group work, public engagement and lessons learnt in 17 European countries	Environmental Research	141		31-41	Abstract A communication strategy was developed by The Consortium to Perform Human Biomonitoring on a European Scale (COPHES), as part of its objectives to develop a framework and protocols to enable the collection of comparable human biomonitoring data throughout Europe. The framework and protocols were tested in the pilot study {DEMOCOPHES} (Demonstration of a study to Coordinate and Perform Hu…	3	3	1	1,2	1,2	1,6	10
624	2015	Persell, Stephen D.; Brown, Tiffany; Lee, Ji Young; Shah, Shreya; Henley, Eric; Long, Timothy; Luther, Stephanie; Lloyd-Jones, Donald M.; Jean-Jacques, Muriel; Kandula, Namratha R.; Sanchez, Thomas; Baker, David W.	Individualized Risk Communication and Outreach for Primary Cardiovascular Disease Prevention in Community Health Centers: Randomized Trial	Circulation Cardiovascular Quality and Outcomes	8	6	560-566	BACKGROUND: Many eligible primary cardiovascular disease prevention candidates are not treated with statins. Electronic health record data can identify patients with increased cardiovascular disease risk.METHODS AND RESULTS: We performed a pragmatic randomized controlled trial at community health centers in 2 states. Participants were men aged ≥35 years and women ≥45 years, without cardiovascular…	1	1	1	1	1	6	8
636	2015	McLean Pirkle, Catherine; Peek-Ball, Cheryl; Outerbridge, Eugene; Rouja, Philippe Max	Examining the Impact of a Public Health Message on Fish Consumption in Bermuda	PLoS One	10	10	e0139459	BACKGROUND: In 2003 mean cord blood mercury concentrations in pregnant Bermudian women exceeded levels associated with adverse health outcomes in children. The principal mercury source was local fish species. Public health messages were developed suggesting pregnant women reduce consumption of fish species with higher mercury concentrations (e.g. swordfish), substituting species containing lower …	1	2	1	1	2	6	7
647	2015	Savoia, Elena; Stoto, Michael A.; Gupta, Rahul; Wright, Nasandra; Viswanath, Kasisomayajula	Public response to the 2014 chemical spill in West Virginia: knowledge, opinions and behaviours	BMC Public Health	15		790	BACKGROUND: On January 9(th) 2014, a faulty storage tank leaked 10,000 gal of an industrial coal processing liquid into the Elk River in West Virginia (WV), contaminating the drinking water of the nine counties collectively known as the Kanawha Valley. The aim of this study was to 1) explore how and when people obtained information about the water contamination and 2) understand how individual an…	1	5	2	1	2	6	10
648	2015	Bonner, Carissa; Jansen, Jesse; Newell, Ben R.; Irwig, Les; Teixeira-Pinto, Armando; Glasziou, Paul; Doust, Jenny; McKinn, Shannon; McCaffery, Kirsten	Is the "Heart Age" Concept Helpful or Harmful Compared to Absolute Cardiovascular Disease Risk? An Experimental Study	Medical Decision Making	35	8	967-978	BACKGROUND: Cardiovascular disease (CVD) prevention guidelines are generally based on the absolute risk of a CVD event, but there is increasing interest in using 'heart age' to motivate lifestyle change when absolute risk is low. Previous studies have not compared heart age to 5-year absolute risk, or investigated the impact of younger heart age, graphical format, and numeracy. OBJECTIVE: Compare…	1	1	1	1	2	3,5,6	8
653	2015	Soukup-Baljak, Yuko; Greer, Alissa M.; Amlani, Ashraf; Sampson, Olivia; Buxton, Jane A.	Drug quality assessment practices and communication of drug alerts among people who use drugs	The International Journal on Drug Policy	26	12	1251-1257	BACKGROUND: Regional health bodies in British Columbia (BC) issue drug alerts to the public when health risks associated with drug quality are identified, such as increased illicit drug deaths, overdoses or other harms. There is a lack of evidence-based guidelines for producing timely, effective public health alerts to mitigate these harms. This study sought to understand (1) the practices used b…	2	1	1	1	1,2	6	19
657	2015	Fraenkel, Liana; Matzko, Cynthia K.; Webb, Debra E.; Oppermann, Brian; Charpentier, Peter; Peters, Ellen; Reyna, Valerie; Newman, Eric D.	Use of Decision Support for Improved Knowledge, Values Clarification, and Informed Choice in Patients With Rheumatoid Arthritis	Arthritis Care & Research	67	11	1496-1502	OBJECTIVE: To examine the potential value of a theory-based, interactive decision support tool in clinical practice for patients with rheumatoid arthritis who are candidates for biologic agents. METHODS: We conducted an 8-week, 2-arm, parallel, single-blind pilot trial in which candidates for treatment escalation with a biologic agent were randomized to receive either a link to a web-based tool o…	1	1	1	1	1	1,2,6	16
659	2015	Tong, Vivien; Raynor, David K.; Blalock, Susan J.; Aslani, Parisa	Consumer interpretation of ramipril and clopidogrel medication risk information-implications for risk communication strategies	Patient Preference and Adherence	9		983-988	PURPOSE: Side effects and side-effect risk information can be provided using written medicine information. However, challenges exist in effectively communicating this information to consumers. This study aimed to explore broad consumer profiles relevant to ramipril and clopidogrel side-effect risk information interpretation. METHODS: Three focus groups were conducted (n=18 consumers) exploring co…	2	1	1	1	2	1	4
668	2015	Watanabe, Hiroshi; Maehara, Yoshiaki; Fujibuchi, Toshioh; Koizumi, Mitsue; Yamaguchi, Ichiro; Kida, Tetsuo; Ooyama, Masaya; Horitsugi, Genki; Hiraki, Hitoshi; Tsukamoto, Atsuko; Itami, Jyun	Assessing the Effectiveness of Risk Communication for Maintenance Workers Who Deal With Induced Radioactivity Management of Medical Linear Accelerators	Health Physics	109	2	145-156	In Japan, an amended law that mandates levels of unintended induced radioactivity has been in effect since 1 April 2012. According to the new regulation, if the concentration of induced radioactivity in affected parts is above the clearance level, the parts must be regarded as radioactive even if they weigh less than 1 kg. This regulation reform raises several new issues concerning medical linear…	1	4	3	2	2	1	3
676	2015	Petrova, Dafina; Garcia-Retamero, Rocio; Cokely, Edward T.	Understanding the Harms and Benefits of Cancer Screening: A Model of Factors That Shape Informed Decision Making	Medical Decision Making	35	7	847-858	OBJECTIVE: Decisions about cancer screenings often involve the consideration of complex and counterintuitive evidence. We investigated psychological factors that promote the comprehension of benefits and harms associated with common cancer screenings and their influence on shared decision making. METHODS: In experiment 1, 256 men received information about PSA-based prostate cancer screening. In …	1	1	1	1	2	1,3,6	31
690	2015	Sinayev, Aleksandr; Peters, Ellen; Tusler, Martin; Fraenkel, Liana	Presenting Numeric Information with Percentages and Descriptive Risk Labels: A Randomized Trial	Medical Decision Making	35	8	937-947	BACKGROUND: Previous research demonstrated that providing (v. not providing) numeric information about the adverse effects (AEs) of medications increased comprehension and willingness to use medication but left open the question about which numeric format is best. The objective was to determine which of 4 tested formats (percentage, frequency, percentage + risk label, frequency + risk label) maxi…	1	1	1	1	2	1,6	25
696	2015	Lu, Christine Y.; Zhang, Fang; Lakoma, Matthew D.; Butler, Melissa G.; Fung, Vicki; Larkin, Emma K.; Kharbanda, Elyse O.; Vollmer, William M.; Lieu, Tracy; Soumerai, Stephen B.; Chen Wu, Ann	Asthma Treatments and Mental Health Visits After a Food and Drug Administration Label Change for Leukotriene Inhibitors	Clinical Therapeutics	37	6	1280-1291	PURPOSE: In 2009, the US Food and Drug Administration (FDA) mandated a label change for leukotriene inhibitors (LTIs) to include neuropsychiatric adverse events (eg, depression and suicidality) as a precaution. This study investigated how this label change affected the use of LTIs and other asthma controller medications, mental health visits, and suicide attempts. METHODS: We analyzed data (2005-…	1	1	1	1	2	6	8
697	2015	Persky, Susan; McBride, Colleen M.; Faith, Myles S.; Wagner, Laura K.; Ward, Dianne S.	Mothers' guilt responses to children's obesity risk feedback	Journal of Health Psychology	20	5	649-658	This study explored the influence of family health history-based obesity risk feedback for their child on 147 overweight mothers' guilt related to children's lifestyle behaviors and passing down a genetic propensity for overweight. Mothers were randomized to receive, or not, obesity risk feedback for their 4- to 5-year-old child and then made food choices for them using a virtual reality-based bu…	1	1	1	1	1	4,6	10
698	2015	Flynn, Darren; Nesbitt, Daniel J.; Ford, Gary A.; McMeekin, Peter; Rodgers, Helen; Price, Christopher; Kray, Christian; Thomson, Richard G.	Development of a computerised decision aid for thrombolysis in acute stroke care	BMC Medical Informatics and Decision Making	15		6	BACKGROUND: Thrombolytic treatment for acute ischaemic stroke improves prognosis, although there is a risk of bleeding complications leading to early death/severe disability. Benefit from thrombolysis is time dependent and treatment must be administered within 4.5 hours from onset of symptoms, which presents unique challenges for development of tools to support decision making and patient underst…	2	1	1	1	1	1,6	35
713	2015	Will, Kelli England; Decina, Lawrence E.; Maple, Erin L.; Perkins, Amy M.	Examining the relative effectiveness of different message framing strategies for child passenger safety: recommendations for increased comprehension and compliance	Accident Analysis & Prevention	79		170-181	BACKGROUND: Age-appropriate child restraints and rear seating dramatically reduce injury in vehicle crashes. Yet parents and caregivers struggle to comply with child passenger safety (CPS) recommendations, and frequently make mistakes when choosing and installing restraints. The purpose of this research was to evaluate various methods of framing CPS recommendations, and to examine the relative ef…	1	7	1	1	2	1,3,6,7	6
714	2015	Wilbur, Kerry; Babiker, Alya; Al-Okka, Maha; Jumaat, Ebaa; Al-Yafei, Sumaya M. Al Saadi; Nashwan, Abdulqadir J.	Risk communication with Arab patients with cancer: a qualitative study of nurses and pharmacists	BMJ Open	5	4	e006890	OBJECTIVES: To explore pharmacist and nurse views and experiences in educating patients regarding their treatment safety and tolerability as well as the roles of other professions in this regard. DESIGN: In this qualitative study, six focus group discussions were conducted. SETTING: The National Center for Cancer Care and Research in Qatar. PARTICIPANTS: Eleven pharmacists and 22 nurses providing…	2	1	1	2	1	6	4
718	2015	Steinhardt, Joseph; Shapiro, Michael A.	Framing Effects in Narrative and Non-Narrative Risk Messages	Risk Analysis	35	8	1423-1436	Narrative messages are increasingly popular in health and risk campaigns, yet gain/loss framing effects have never been tested with such messages. Three experiments examined framing in narrative messages. Experiment 1 found that only the character's decision, not framing, influenced judgments about characters in a narrative derived from a prospect theory context. Experiment 2 found that a framing…	1	7	1	1	2	3,6	10
719	2015	Dieckmann, Nathan F.; Peters, Ellen; Gregory, Robin	At Home on the Range? Lay Interpretations of Numerical Uncertainty Ranges	Risk Analysis	35	7	1281-1295	Numerical uncertainty ranges are often used to convey the precision of a forecast. In three studies, we examined how users perceive the distribution underlying numerical ranges and test specific hypotheses about the display characteristics that affect these perceptions. We discuss five primary conclusions from these studies: (1) substantial variation exists in how people perceive the distribution…	1	6	1	1	2	3	15
723	2015	Oudhoff, Jurriaan P.; Timmermans, Danielle R. M.	The effect of different graphical and numerical likelihood formats on perception of likelihood and choice	Medical Decision Making	35	4	487-500	BACKGROUND: Quantitative risk information plays an important role in decision making about health. This study focuses on commonly used numerical and graphical formats and examines their effect on perception of different likelihoods and choice preferences.METHODS: An experimental study was conducted with 192 participants, who evaluated 2 sets of 4 lotteries. Numerical formats to describe likelihoo…	1	7	1	1	2	3,6	18
724	2015	Hagiwara, Hiromi; Nakano, Shun; Ogawa, Yoshihiro; Tohkin, Masahiro	The effectiveness of risk communication regarding drug safety information: a nationwide survey by the Japanese public health insurance claims data	Journal of Clinical Pharmacy and Therapeutics	40	3	273-278	WHAT IS KNOWN AND OBJECTIVE: We evaluated the effectiveness of warning letters published by the pharmaceutical regulatory agency in Japan on communication of drug safety and risk by quantitative analysis of the national health insurance claims database (NHICD). We then explored what factors may have affected risk communication. METHODS: We measured the implementation rate of the hepatitis virus-m…	1	1	1	1	2	6	5
731	2015	Asimakopoulou, Koula; Newton, Jonathon Tim; Daly, Blanaid; Kutzer, Yvonne; Ide, Mark	The effects of providing periodontal disease risk information on psychological outcomes - a randomized controlled trial	Journal of Clinical Periodontology	42	4	350-355	AIM: In a two arm randomized controlled trial this study compared the effects of a routine periodontal assessment consultation versus a routine consultation + individualized risk assessment communication intervention on patient thoughts and emotions about periodontal disease. MATERIALS AND METHODS: Adults (N = 102) with moderate/advanced chronic periodontitis referred to a Periodontology Departme…	1	1	1	1	1	1,2,5,6,7	23
736	2015	Lefevre, Carmen E.; Bruine de Bruin, Wandi; Taylor, Andrea L.; Dessai, Suraje; Kovats, Sari; Fischhoff, Baruch	Heat protection behaviors and positive affect about heat during the 2013 heat wave in the United Kingdom	Social Science & Medicine (1982)	128		282-289	Heat waves pose serious health risks, and are expected to become more frequent, longer lasting, and more intense in the future under a changing climate. Yet, people in the UK seem to feel positive when thinking about hot weather. According to research on the affect heuristic, any positive or negative emotions evoked by potentially risky experiences may be used as cues to inform concerns about ris…	1	5	2	1	2	5,6	24
740	2015	Cezar-Vaz, Marta Regina; Bonow, Clarice Alves; Vaz, Joana Cezar	Risk communication concerning welding fumes for the primary preventive care of welding apprentices in southern Brazil	International Journal of Environmental Research and Public Health	12	1	986-1002	This study's aim was to assess the perceptions of welding apprentices concerning welding fumes being associated with respiratory and cardiovascular disorders and assess the implementation of risk communication as a primary prevention tool in the welding training process. This quasi-experimental, non-randomized study with before-and-after design was conducted with 84 welding apprentices in Souther…	1	3	1	2	2	3	6
749	2015	Yi, Haeseung; Xiao, Tong; Thomas, Parijatham S.; Aguirre, Alejandra N.; Smalletz, Cindy; Dimond, Jill; Finkelstein, Joseph; Infante, Katherine; Trivedi, Meghna; David, Raven; Vargas, Jennifer; Crew, Katherine D.; Kukafka, Rita	Barriers and Facilitators to Patient-Provider Communication When Discussing Breast Cancer Risk to Aid in the Development of Decision Support Tools	AMIA Annual Symposium Proceedings			1352-1360	The purpose of this study was to identify barriers and facilitators to patient-provider communication when discussing breast cancer risk to aid in the development of decision support tools. Four patient focus groups (N=34) and eight provider focus groups (N=10) took place in Northern Manhattan. A qualitative analysis was conducted using Atlas.ti software. The coding yielded 62.3%-94.5% agreement.…	1	1	1	1,2	1	6	10
752	2015	Bennin, Fiona; Rother, Hanna-Andrea	"But it's just paracetamol": Caregivers' ability to administer over-the-counter painkillers to children with the information provided	Patient Education and Counseling	98	3	331-337	OBJECTIVE: To determine whether caregivers are able to make informed decisions about their families' use of over-the-counter (OTC) painkillers through access to and use of three mechanisms of information provision. METHODS: A cross sectional, face-to-face questionnaire was administered to 60 caregivers and seven pharmacists in Cape Town, South Africa. Caregivers answered questions related to para…	1	1	1	2	2	6	15
768	2015	Lopez-Gonzalez, Angel A.; Aguilo, Antoni; Frontera, Margalida; Bennasar-Veny, Miquel; Campos, Irene; Vicente-Herrero, Teofila; Tomas-Salva, Matias; De Pedro-Gomez, Joan; Tauler, Pedro	Effectiveness of the Heart Age tool for improving modifiable cardiovascular risk factors in a Southern European population: a randomized trial	European Journal of Preventive Cardiology	22	3	389-396	AIMS: To test whether communicating cardiovascular diseases (CVD) risk using a novel risk assessment tool (Heart Age) will be able to motivate a population to adopt healthier lifestyles and improve CVD risk profile over the use of a traditional percentage-based tool. METHODS: A single-blind randomized intervention study was carried out in a Caucasian population. A total of 3153 subjects were rand…	1	1	1	1	1	6	62
780	2015	Janssen, Eva; van Osch, Liesbeth; Lechner, Lilian; de Vries, Hein	Influencing feelings of cancer risk: Direct and moderator effects of affectively laden phrases in risk communication	Journal of Health Communication	20	3	321-327	Evidence is accumulating for the importance of feelings of risk in explaining cancer preventive behaviors, but best practices for influencing these feelings are limited. This study investigated the direct and moderational influence of affectively laden phrases in cancer risk messages. Two experimental studies were conducted in relation to different cancer-related behaviors—sunbed use (n = 112) an…	1	1	1	1	1	3,6	1
782	2015	Clarke, Christopher E.; McKeever, Brooke Weberling; Holton, Avery; Dixon, Graham N.	The influence of weight-of-evidence messages on (vaccine) attitudes: A sequential mediation model	Journal of Health Communication	20	11	1302-1309	Media coverage of contentious risk issues often features competing claims about whether a risk exists and what scientific evidence shows, and journalists often cover these issues by presenting both sides. However, for topics defined by scientific agreement, balanced coverage erroneously heightens uncertainty about scientific information and the issue itself. In this article, we extend research on…	1	1	1	1	2	6	12
784	2015	Nan, Xiaoli; Dahlstrom, Michael F.; Richards, Adam; Rangarajan, Sarani	Influence of evidence type and narrative type on HPV risk perception and intention to obtain the HPV vaccine	Health Communication	30	3	301-308	This research examines the influence of evidence type (statistical, narrative, or hybrid) and narrative type (first-person or third-person) on risk perception about human papillomavirus (HPV) and behavioral intention to get the HPV vaccine. In total, 174 college students who had not received the HPV vaccine participated in a controlled experiment. Results show that the hybrid message containing b…	1	1	1	1	2	3,6	62
785	2015	Edworthy, Judy; Hellier, Elizabeth; Newbold, Lex; Titchener, Kirsteen	Passing crisis and emergency risk communications: The effects of communication channel, information type, and repetition	Applied Ergonomics	48		252-262	Three experiments explore several factors which influence information transmission when warning messages are passed from person to person. In Experiment 1, messages were passed down chains of participants using five different modes of communication. Written communication channels resulted in more accurate message transmission than verbal. In addition, some elements of the message endured further …	1	7	1	1	2	1	4
787	2015	Tuyet-Hanh, Tran Thi; Vu-Anh, Le; Dunne, Michael; Toms, Leisa-Maree; Tenkate, Thomas; Harden, Fiona	Sustainability of public health interventions to reduce the risk of dioxin exposure at severe dioxin hot spots in Vietnam	Journal of Community Health: The Publication for Health Promotion and Disease Prevention	40	4	652-659	Severe dioxin contamination at Bien Hoa and Da Nang airbases, Vietnam is of international concern. Public Health risk reduction programs were implemented in Bien Hoa in 2007–2009 and in Da Nang in 2009–2011. In 2009 and 2011 we reported the encouraging results of these interventions in improving the knowledge, attitude and practices (KAP) of local residents in reducing the dioxin exposure risk th…	1	3	1	1	2	1,6	0
792	2015	Rakow, Tim; Wright, Rebecca J.; Spiegelhalter, David J.; Bull, Catherine	The pros and cons of funnel plots as an aid to risk communication and patient decision making	British Journal of Psychology	106	2	327-348	Funnel plots, which simultaneously display a sample statistic and the corresponding sample size for multiple cases, have a range of applications. In medicine, they are used to display treatment outcome rates and caseload volume by institution, which can inform strategic decisions about health care delivery. We investigated lay people's understanding of such plots and explored their suitability as…	1	1	1	1	2	1,6	11
794	2015	Barratt, Helen; Harrison, David A.; Raine, Rosalind; Fulop, Naomi J.	Factors that influence the way local communities respond to consultation processes about major service change: A qualitative study	Health Policy	119	9	1210-1217	Objectives: In England, proposed service changes such as Emergency Department closures typically face local opposition. Consequently, public consultation exercises often involve protracted, hostile debates. This study examined a process aimed at engaging a community in decision-making about service reconfiguration, and the public response to this process. Methods: A documentary analysis was condu…	2	1	1	1	2	2,5,6	3
795	2015	Iseki, Ryuta; Kusumi, Takashi	Effects of source information on learning and integration of information on genetically modified foods	Psychologia: An International Journal of Psychological Sciences	58	3	127-144	This study investigated whether source information attached to texts influences multiple-text comprehension about genetically modified (GM) foods—a controversial science topic. Participants in the experiment read two texts from two sources' an expert and/or a layperson. When the two texts presented different attitudes toward GM foods (Experiment 1), expert information facilitated intra-text compr…	1	2	1	1	2	3	6
798	2015	de Boer, Joop; Botzen, W. J. Wouter; Terpstra, Teun	More than fear induction: Toward an understanding of people's motivation to be well‐prepared for emergencies in flood‐prone areas	Risk Analysis	35	3	518-535	This article examines the extent and manner to which evaluations of flood‐related precautions are affected by an individual's motivation and perception of context. It argues that the relationship between risk perception and flood risk preparedness can be fruitfully specified in terms of vulnerability and efficacy if these concepts are put into the perspective of prevention‐focused motivation. Thi…	1	5	1	1	2	3,6	21
799	2015	Birmingham, Wendy C.; Hung, Man; Boonyasiriwat, Watcharaporn; Kohlmann, Wendy; Walters, Scott T.; Burt, Randall W.; Stroup, Antoinette M.; Edwards, Sandie L.; Schwartz, Marc D.; Lowery, Jan T.; Hill, Deirdre A.; Wiggins, Charles L.; Higginbotham, John C.; Tang, Philip; Hon, Shirley D.; Franklin, Jeremy D.; Vernon, Sally; Kinney, Anita Y.	Effectiveness of the extended parallel process model in promoting colorectal cancer screening	Psycho-Oncology	24	10	1265-1278	OBJECTIVE: Relatives of colorectal cancer (CRC) patients are at increased risk for the disease, yet screening rates still remain low. Guided by the Extended Parallel Process Model, we examined the impact of a personalized, remote risk communication intervention on behavioral intention and colonoscopy uptake in relatives of CRC patients, assessing the original additive model and an alternative mod…	1	1	1	1	1	6	10
800	2015	Stone, Eric R.; Gabard, Alexis R.; Groves, Aislinn E.; Lipkus, Isaac M.	Effects of numerical versus foreground-only icon displays on understanding of risk magnitudes	Journal of Health Communication	20	10	1230-1241	The aim of this work is to advance knowledge of how to measure gist and verbatim understanding of risk magnitude information and to apply this knowledge to address whether graphics that focus on the number of people affected (the numerator of the risk ratio, i.e., the foreground) are effective displays for increasing (a) understanding of absolute and relative risk magnitudes and (b) risk avoidanc…	1	1	1	1	2	1,3	13
802	2015	Hirota, Sumire	Effects of Japanese citizen's numeracy and educational levels on biases in decision making [Effects of Japanese citizen's numeracy and educational levels on biases in decision making]	Cognitive Studies: Bulletin of the Japanese Cognitive Science Society	22	3	409-425	The purpose of this study was to explore the effects of the numeracy and educational levels on biases in five decision tasks: denominator neglect, risk-format effect in breast cancer screening risk communication, misunderstanding of correlation, framing effect, and conjunction fallacy. An internet survey was conducted with Japanese citizens in metropolitan areas (n = 960) whose numeracy scores we…	1	7	1	1	2	1	2
804	2015	Moussaïd, Mehdi; Brighton, Henry; Gaissmaier, Wolfgang	The amplification of risk in experimental diffusion chains	PNAS Proceedings of the National Academy of Sciences of the United States of America	112	18	5631-5636	Understanding how people form and revise their perception of risk is central to designing efficient risk communication methods, eliciting risk awareness, and avoiding unnecessary anxiety among the public. However, public responses to hazardous events such as climate change, contagious outbreaks, and terrorist threats are complex and difficult-to-anticipate phenomena. Although many psychological f…	1	3	1	1	1	1,3	46
807	2015	Kelly, Kimberly M.; Ellington, Lee; Schoenberg, Nancy; Jackson, Thomas; Dickinson, Stephanie; Porter, Kyle; Leventhal, Howard; Andrykowski, Michael	Genetic counseling content: How does it impact health behavior?	Journal of Behavioral Medicine	38	5	766-776	Women with hereditary breast-ovarian cancer face decisions about screening (transvaginal ultrasound, CA125, mammography, breast exams) and proactive (before cancer) or reactive (after cancer) surgery (oophorectomy, mastectomy). The content of genetic counseling and its relation to these key health behaviors is largely unexamined. Ashkenazi Jewish women (n = 78) were surveyed through the process o…	1	1	1	1	1	6	11
808	2015	Garcia-Retamero, Rocio; Cokely, Edward T.	Simple but powerful health messages for increasing condom use in young adults	The Journal of Sex Research	52	1	30-42	In a large longitudinal study involving young adults, we conducted an eight-hour STD educational intervention and examined the impact of the intervention on the efficacy of a message for promoting condom use. The message was framed in positive or negative terms and was presented visually or in numbers (percentages or frequencies). Results indicated that the numerical positive-framed message incre…	1	7	1	1	2	6	33
811	2015	Witteman, Holly O.; Dansokho, Selma Chipenda; Exe, Nicole; Dupuis, Audrey; Provencher, Thierry; Zikmund‐Fisher, Brian J.	Risk communication, values clarification, and vaccination decisions	Risk Analysis	35	10	1801-1819	Many health-related decisions require choosing between two options, each with risks and benefits. When presented with such tradeoffs, people often make choices that fail to align with scientific evidence or with their own values. This study tested whether risk communication and values clarification methods could help parents and guardians make evidence-based, values-congruent decisions about chil…	1	1	1	1	2	6	20
813	2015	Hamstra, Daniel A.; Johnson, Skyler B.; Daignault, Stephanie; Zikmund-Fisher, Brian J.; Taylor, Jeremy M. G.; Larkin, Knoll; Wood, Alexander; Fagerlin, Angela	The impact of numeracy on verbatim knowledge of the longitudinal risk for prostate cancer recurrence following radiation therapy	Medical Decision Making	35	1	27-36	OBJECTIVE: . Given the long natural history of prostate cancer, we assessed differing graphical formats for imparting knowledge about the longitudinal risks of prostate cancer recurrence with or without 'hormone' or 'androgen deprivation' therapy.METHODS: . Male volunteers without a history of prostate cancer were randomized to 1 of 8 risk communication instruments that depicted the likelihood of…	1	1	1	1	2	1,2	13
814	2015	Kukafka, Rita; Yi, Haeseung; Xiao, Tong; Thomas, Parijatham; Aguirre, Alejandra; Smalletz, Cindy; David, Raven; Crew, Katherine	Why breast cancer risk by the numbers is not enough: Evaluation of a decision aid in multi-ethnic, low-numerate women	Journal of Medical Internet Research	17	7	e165	Background: Breast cancer risk assessment including genetic testing can be used to classify people into different risk groups with screening and preventive interventions tailored to the needs of each group, yet the implementation of risk-stratified breast cancer prevention in primary care settings is complex. Objective: To address barriers to breast cancer risk assessment, risk communication, and…	1	1	1	1	1	1,2,3,6	12
815	2015	Fraustino, Julia Daisy; Ma, Liang	CDC’s use of social media and humor in a risk campaign—"Preparedness 101: Zombie apocalypse"	Journal of Applied Communication Research	43	2	222-241	This is a multiple methods study that highlights the tension between awareness- and behavioral-based campaign successes, particularly when communicating using social media and pop-culture-referencing humor. To illustrate, it examines the Centers for Disease Control and Prevention's (CDC) “zombie apocalypse” all-disaster-preparedness campaign. An interview with a CDC campaign manager, campaign doc…	1	5	1	1	2	6	32
835	2014	Hsieh, Cheng-Yang; Chen, Wei-Fen; Chen, Chih-Hung; Wang, Chih-Yuan; Chen, Chien-Jung; Lai, Edward Chia-Cheng; Chen, Tsang-Shan	Efforts to reduce the door-to-needle time of thrombolysis in acute ischemic stroke: Video-assisted therapeutic risk communication	Journal of the Formosan Medical Association	113	12	929-933	BACKGROUND/PURPOSE: Explaining the risks and benefits of recombinant tissue-plasminogen activator (rtPA) to eligible patients with acute ischemic stroke (AIS) within a few minutes is important but difficult. We examined whether a new thrombolysis program can decrease the door-to-needle (DTN) time when treating patients with AIS.METHODS: A new rtPA thrombolysis program with video assistance was ad…	1	1	1	1	1	6	16
849	2014	Cronin, Karen; Midgley, Gerald; Jackson, Laurie Skuba	Issues Mapping: A problem structuring method for addressing science and technology conflicts	European Journal of Operational Research	233	1	145-158	Abstract There are new opportunities for the application of problem structuring methods to address science and technology risk conflicts through stakeholder dialogue. Most previous approaches to addressing risk conflicts have been developed from a traditional risk communication perspective, which tends to construct engagement between stakeholders based on the assumption that scientists evaluate t…	3	7	1	1,2	2	1,5,8	28
853	2014	Lieske, David J.; Wade, Tracey; Roness, Lori Ann	Climate change awareness and strategies for communicating the risk of coastal flooding: A Canadian Maritime case example	Estuarine, Coastal and Shelf Science	140		83-94	Abstract Rising sea levels, due to thermal expansion of the ocean, and higher frequency and intensity of coastal and inland storms threaten coastal communities worldwide. The implementation of pro-active, planned adaptation to reduce community vulnerability is strongly dependent upon people's perception of the threat posed to their communities at the local scale. Unfortunately, the scarcity of re…	1	5	1	1	2	3	42
858	2014	Hellier, E.; Edworthy, J.; Newbold, L.; Titchener, K.; Tucker, M.; Gabe-Thomas, E.	Evaluating the application of research-based guidance to the design of an emergency preparedness leaflet	Applied Ergonomics	45	5	1320-1329	Abstract Guidelines for the design of emergency communications were derived from primary research and interrogation of the literature. The guidelines were used to re-design a nuclear emergency preparedness leaflet routinely distributed to households in the local area. Pre-test measures of memory for, and self-reported understanding of, nuclear safety information were collected. The findings revea…	1	4	1	1	2	1,2	1
864	2014	Kaiser, Marta; Zimmer, René; Brunsting, Suzanne; Mastop, Jessanne; Pol, Mariëtte	Development of {CCS} Projects in Poland How to Communicate with the Local Public?	Energy Procedia	51		267-273	Abstract Poland has made concrete promises to the EU to reduce its CO2 emissions within the next years by a considerable amount. CCS technology could provide a way to reduce CO2 emissions significantly without slowing the country's economic growth. Social acceptance at potential storage sites for CO2 has proven to be decisive for the development of CCS projects in other European countries. Theref…	1,2	6	1	1	2	1	4
865	2014	Mascarello, Giulia; Crovato, Stefania; Pinto, Anna; Gallina, Albino; Siegrist, Michael; Ravarotto, Licia	Communicating chemical risk in food to adolescents A comparison of web and print media	Food Control	35	1	407-412	Abstract The study addressed the communication of chemical risks in food to adolescents with a view to evaluating the potential, the effectiveness and the limitations of web- and paper-based tools. The tools were developed through a participatory process based on the active involvement of the target group. The method used to convey the communication message was storytelling. A sample of 327 stude…	1	2	1	1	2	1,3	5
895	2014	Leidner, Andrew J.	Estimating the effectiveness of health-risk communications with propensity-score matching: application to arsenic groundwater contamination in four US locations	Journal of Environmental and Public Health	14		783902	This paper provides a demonstration of propensity-score matching estimation methods to evaluate the effectiveness of health-risk communication efforts. This study develops a two-stage regression model to investigate household and respondent characteristics as they contribute to aversion behavior to reduce exposure to arsenic-contaminated groundwater. The aversion activity under study is a househo…	1	3	1	1	2	6	0
897	2014	Connelly, Nancy A.; Lauber, T. Bruce; Niederdeppe, Jeff; Knuth, Barbara A.	How can more women of childbearing age be encouraged to follow fish consumption recommendations?	Environmental Research	135		88-94	Several studies show that most women do not consume enough fish during pregnancy (and afterward) to derive the maximum health benefits for themselves and their babies, according to the USDA guidelines. We engaged in a two-part study to better understand what might be done to encourage women of childbearing age to eat healthy fish-a mail survey of women who recently gave birth in Minnesota, Wiscon…	1,2	2	1	1	2	6	5
898	2014	Feenstra, Hans; Ruiter, Robert A. C.; Kok, Gerjo	Evaluating traffic informers: testing the behavioral and social-cognitive effects of an adolescent bicycle safety education program	Accident Analysis & Prevention	73		288-295	In The Netherlands, 12-24 years old are over-represented in the total number of traffic fatalities and injuries. In this study, the traffic informer program - designed to promote safe traffic behavior in the pre-driver population - was experimentally evaluated, with a specific focus on bicycle use. Students were subjected to graphic videos of traffic accidents and listened to a first-person narra…	1	7	1	1	2	3,6,7	11
924	2014	Bradley, Declan T.; Johnston, Jillian; Smyth, Brian	Public health risk communication by text message in response to a cluster of invasive meningococcal infection in a primary school	PLoS Currents	6			Public health risk communication during emergencies should be rapid and accurate in order to allow the audience to take steps to prevent adverse outcomes. Delays to official communications may cause unnecessary anxiety due to uncertainty or inaccurate information circulating within the at-risk group. Modern electronic communications present opportunities for rapid, targeted public health risk com…	3	1	2	1,2	2	1	0
925	2014	Bonner, Carissa; Jansen, Jesse; McKinn, Shannon; Irwig, Les; Doust, Jenny; Glasziou, Paul; McCaffery, Kirsten	Communicating cardiovascular disease risk: an interview study of General Practitioners' use of absolute risk within tailored communication strategies	BMC Family Practice	15		106	BACKGROUND: Cardiovascular disease (CVD) prevention guidelines encourage assessment of absolute CVD risk - the probability of a CVD event within a fixed time period, based on the most predictive risk factors. However, few General Practitioners (GPs) use absolute CVD risk consistently, and communication difficulties have been identified as a barrier to changing practice. This study aimed to explor…	2	1	1	2	1	3	28
932	2014	Bodemer, Nicolai; Meder, Bjorn; Gigerenzer, Gerd	Communicating Relative Risk Changes with Baseline Risk: Presentation Format and Numeracy Matter	Medical Decision Making	34	5	615-626	BACKGROUND: Treatment benefits and harms are often communicated as relative risk reductions and increases, which are frequently misunderstood by doctors and patients. One suggestion for improving understanding of such risk information is to also communicate the baseline risk. We investigated 1) whether the presentation format of the baseline risk influences understanding of relative risk changes …	1	1	1	1	2	1	22
940	2014	Caverly, Tanner J.; Prochazka, Allan V.; Binswanger, Ingrid A.; Kutner, Jean S.; Matlock, Daniel D.	Confusing Relative Risk with Absolute Risk Is Associated with More Enthusiastic Beliefs about the Value of Cancer Screening	Medical Decision Making	34	5	686-692	BACKGROUND: Reviews of how data are presented in medical literature document that the benefit from an intervention is often exaggerated relative to the harm (e.g., relative risk for benefit and absolute risk for harm). Such mismatched presentations may create unwarranted enthusiasm, especially among those who misinterpret the statistics presented. The objective was to determine whether misinterpr…	1	1	1	2	2	6	7
942	2014	Harmsen, Charlotte Gry; Kristiansen, Ivar Sonbo; Larsen, Pia Veldt; Nexoe, Jorgen; Stovring, Henrik; Gyrd-Hansen, Dorte; Nielsen, Jesper Bo; Edwards, Adrian; Jarbol, Dorte Ejg	Communicating risk using absolute risk reduction or prolongation of life formats: cluster-randomised trial in general practice	The British Journal of General Practice : the journal of the Royal College of General Practitioners	64	621	e199-207	BACKGROUND: It is important that patients are well-informed about risks and benefits of therapies to help them decide whether to accept medical therapy. Different numerical formats can be used in risk communication but It remains unclear how the different formats affect decisions made by real-life patients. AIM: To compare the impact of using Prolongation Of Life (POL) and Absolute Risk Reduction…	1	1	1	1,2	1	2,6	19
947	2014	Goto, Aya; Rudd, Rima E.; Lai, Alden Y.; Yoshida, Kazuki; Suzuki, Yuu; Halstead, Donald D.; Yoshida-Komiya, Hiromi; Reich, Michael R.	Leveraging public health nurses for disaster risk communication in Fukushima City: a qualitative analysis of nurses' written records of parenting counseling and peer discussions	BMC Health Services Research	14		129	BACKGROUND: Local public health nurses (PHNs) have been recognized as the main health service providers in communities in Japan. The Fukushima nuclear disaster in 2011 has, however, created a major challenge for them in responding to mothers' concerns. This was in part due to difficulties in assessing, understanding and communicating health risks on low-dose radiation exposure. In order to guide …	2	4	3	1	1	6	38
948	2014	Witteman, Holly O.; Fuhrel-Forbis, Andrea; Wijeysundera, Harindra C.; Exe, Nicole; Dickson, Mark; Holtzman, Lisa; Kahn, Valerie C.; Zikmund-Fisher, Brian J.	Animated randomness, avatars, movement, and personalization in risk graphics	Journal of Medical Internet Research	16	3	e80	BACKGROUND: Risk communication involves conveying two inherently difficult concepts about the nature of risk: the underlying random distribution of outcomes and how a population-based proportion applies to an individual. OBJECTIVE: The objective of this study was to test whether 4 design factors in icon arrays-animated random dispersal of risk events, avatars to represent an individual, personali…	1	1	1	1	2	1,3,6	16
950	2014	Santaweesuk, Sapsatree; Chapman, Robert S.; Siriwong, Wattasit	Effects of an injury and illness prevention program on occupational safety behaviors among rice farmers in Nakhon Nayok Province, Thailand	Risk Management and Healthcare Policy	7		51-60	The objective of this study was to determine the effects of an Injury and Illness Prevention (IIP) program intervention on occupational safety behavior among rice farmers in Nakhon Nayok Province, Thailand. This was a quasi-experimental study in an intervention group and a control group. It was carried out in two rice farming communities, in which most people are rice farmers with similar socio-d…	1	3	1	2	2	6	4
960	2014	Oldroyd, John C.; Levinson, Michele R.; Stephenson, Gemma; Rouse, Alice; Leeuwrik, Tina	A focus group study investigating medical decision making in octogenarians of high socioeconomic status with successful outcomes following cardiac surgery	Australasian Journal on Ageing	33	3	174-179	AIM: To explore medical decision making in octogenarians having cardiac surgery. METHODS: Five focus groups conducted in a private hospital setting with octogenarians of high socioeconomic status who had successful cardiac surgery in the previous 3-13 months. RESULTS: ctogenarian's motivations for having cardiac surgery include survival, relief of symptoms, convenience and improving quality of li…	2	1	1	1	1	6	3
964	2014	Al Juffali, L.; Al Omran, O.; Al Aqeel, S.	Saudi young patient understanding of information about side effects: Verbal versus numerical expression	Saudi Pharmaceutical Journal : SPJ : the official publication of the Saudi Pharmaceutical Society	22	1	33-37	OBJECTIVE: To determine the effect of providing different formats about side effect information (verbal versus numerical) to acne patients in Saudi Arabia that are newly prescribed Roaccutane. DESIGN: A prospective study assessing patients' degree of estimation about side effect information. PARTICIPANTS: One hundred and forty-one acne patients newly prescribed Roaccutane. SETTINGS: Four dermatol…	1	1	1	1	2	3	4
965	2014	Wegwarth, O.; Kurzenhauser-Carstens, S.; Gigerenzer, G.	Overcoming the knowledge-behavior gap: The effect of evidence-based HPV vaccination leaflets on understanding, intention, and actual vaccination decision	Vaccine	32	12	1388-1393	OBJECTIVE: Informed decision making requires transparent and evidence-based (=balanced) information on the potential benefit and harms of medical preventions. An analysis of German HPV vaccination leaflets revealed, however, that none met the standards of balanced risk communication. METHODS: We surveyed a sample of 225 girl-parent pairs in a before-after design on the effects of balanced and unb…	1	1	1	1	2	1,3,6	32
966	2014	Kinney, Anita Y.; Boonyasiriwat, Watcharaporn; Walters, Scott T.; Pappas, Lisa M.; Stroup, Antoinette M.; Schwartz, Marc D.; Edwards, Sandra L.; Rogers, Amy; Kohlmann, Wendy K.; Boucher, Kenneth M.; Vernon, Sally W.; Simmons, Rebecca G.; Lowery, Jan T.; Flores, Kristina; Wiggins, Charles L.; Hill, Deirdre A.; Burt, Randall W.; Williams, Marc S.; Higginbotham, John C.	Telehealth personalized cancer risk communication to motivate colonoscopy in relatives of patients with colorectal cancer: the family CARE Randomized controlled trial	Journal of Clinical Oncology : official journal of the American Society of Clinical Oncology	32	7	654-662	PURPOSE: The rate of adherence to regular colonoscopy screening in individuals at increased familial risk of colorectal cancer (CRC) is suboptimal, especially among rural and other geographically underserved populations. Remote interventions may overcome geographic and system-level barriers. We compared the efficacy of a telehealth-based personalized risk assessment and communication intervention…	1	1	1	1	1	6	37
969	2014	Anderson, A. E.; Flores, K. G.; Boonyasiriwat, W.; Gammon, A.; Kohlmann, W.; Birmingham, W. C.; Schwartz, M. D.; Samadder, J.; Boucher, K.; Kinney, A. Y.	Interest and informational preferences regarding genomic testing for modest increases in colorectal cancer risk	Public Health Genomics	17	1	48-60	BACKGROUND/AIMS: This study explored the interest in genomic testing for modest changes in colorectal cancer risk and preferences for receiving genomic risk communications among individuals with intermediate disease risk due to a family history of colorectal cancer. METHODS: Surveys were conducted on 272 men and women at intermediate risk for colorectal cancer enrolled in a randomized trial compa…	1	1	1	1	1	6	9
970	2014	Sumi, Eriko; Yamazaki, Toru; Tanaka, Shiro; Yamamoto, Keiichi; Nakayama, Takeo; Bessho, Kazuhisa; Yokode, Masayuki	The increase in prescriptions of bisphosphonates and the incidence proportion of osteonecrosis of the jaw after risk communication activities in Japan: a hospital-based cohort study	Pharmacoepidemiology and Drug Safety	23	4	398-405	PURPOSE: The purpose of this study was to investigate the impact of risk communication about bisphosphonate (BP)-related osteonecrosis of the jaw (ONJ) on the number of reported cases to the Drug Adverse Reactions Reporting System and on the incidence proportion of ONJ in a hospital-based cohort study in Japan. METHOD: We conducted a survey of the safety information on BP-related ONJ available fr…	1	1	1	2	2	6	13
972	2014	Wogalter, Michael S.; Shaver, Eric F.; Kalsher, Michael J.	Effect of presentation modality in direct-to-consumer (DTC) prescription drug television advertisements	Applied Ergonomics	45	5	1330-1336	Direct-to-consumer (DTC) drug advertising markets medications requiring a physician's script to the general public. In television advertising, risk disclosures (such as side effects and contraindications) may be communicated in either auditory (voice) or visual (text) or both in the commercials. This research examines presentation modality factors affecting the communication of the risk disclosur…	1	1	1	1	2	1	12
978	2014	Peters, Ellen; Hart, P. Sol; Tusler, Martin; Fraenkel, Liana	Numbers matter to informed patient choices: a randomized design across age and numeracy levels	Medical Decision Making	34	4	430-442	BACKGROUND: How drug adverse events (AEs) are communicated in the United States may mislead consumers and result in low adherence. Requiring written information to include numeric AE-likelihood information might lessen these effects, but providing numbers may disadvantage less skilled populations. The objective was to determine risk comprehension and willingness to use a medication when presented…	1	1	1	1	2	3,6	47
982	2014	Kellar, I.; Mason, D.	Social patterning in knowledge following an informed choice invitation for type 2 diabetes screening	Diabetic Medicine	31	4	504-508	AIMS: To describe prevalence of knowledge of items specified by the U.K. General Medical Council as required to make an informed choice following an invitation for screening for type 2 diabetes and investigate whether knowledge was socio-economically patterned. METHODS: A 9-item knowledge questionnaire was employed immediately following an informed choice invitation to type 2 diabetes screening t…	1	1	1	1	1	1	3
989	2014	McLaughlin, Anne Collins; Mayhorn, Christopher B.	Designing effective risk communications for older adults	Safety Science	61		59-65	Older adults make daily decisions concerning risk communications about product use, activities, or emergency situations. Appropriate compliance with warnings and notifications depends on comprehension of the hazard. Unfortunately, risk communications are often designed without considering the physical and cognitive changes that can accompany aging. This article details age-related changes and the…	3	7	1	1	2	3	22
991	2014	Hirota, Sumire	Risk perceptions of death rates from hazards described as time scale versus as population scale [Risk perceptions of death rates from hazards described as time scale versus as population scale]	The Japanese Journal of Social Psychology	30	2	121-131	Perceptions of death rates from hazards described in terms of their occurrence rates (time) versus the number of persons affected (population) were examined in three experiments. In experiment 1, participants judged the death rates from five anonymous real hazards that were described in terms of time or population, using cognitive, affective, and behavioral scales. They rated the time-related haz…	1	5,7	1	1	2	1,3	2
996	2014	Price-Haywood, Eboni G.; Harden-Barrios, Jewel; Cooper, Lisa A.	Comparative effectiveness of audit-feedback versus additional physician communication training to improve cancer screening for patients with limited health literacy	Journal of General Internal Medicine	29	8	1113-1121	Background: We designed a continuing medical education (CME) program to teach primary care physicians (PCP) how to engage in cancer risk communication and shared decision making with patients who have limited health literacy (HL). Objectives: We evaluated whether training PCPs, in addition to audit-feedback, improves their communication behaviors and increases cancer screening among patients with…	1	1	1	1	1	1,2,6	24
1000	2014	Neufingerl, Nicole; Cobain, Mark R.; Newson, Rachel S.	Web-based self-assessment health tools: Who are the users and what is the impact of missing input information?	Journal of Medical Internet Research	16	9	e215	BACKGROUND: Web-based health applications, such as self-assessment tools, can aid in the early detection and prevention of diseases. However, there are concerns as to whether such tools actually reach users with elevated disease risk (where prevention efforts are still viable), and whether inaccurate or missing information on risk factors may lead to incorrect evaluations. OBJECTIVE: This study a…	1	1	1	1	2	3	11
1005	2014	Ou, Shih-Ming; Liu, Li-Ling; Chin, Ko-Chien	Enhancing risk communication for more effective epidemic control in Taiwan	Asia-Pacific Journal of Public Health	26	1	85-92	This article investigates how to more effectively conduct risk communication to increase the probability of successful control of an epidemic in Taiwan. The epidemic control of H1N1 in Taiwan in 2010 was studied. We used factor analysis and Decision-Making Trial and Evaluation Laboratory (DEMATEL) to obtain the total influence for each factor and to determine the critical factors among them. Afte…	1	1	1	1	1	6	3
1008	2014	Terpstra, T.; Zaalberg, R.; Boer, J.; Botzen, W. J. W.	You have been framed! How antecedents of information need mediate the effects of risk communication messages	Risk Analysis	34	8	1506-1520	This study investigates the processes that mediate the effects of framing flood risks on people's information needs. Insight into the effects of risk frames is important for developing balanced risk communication that explains both risks and benefits of living near water. The research was inspired by the risk information seeking and processing model and related models. In a web‐based survey, resp…	1	5	1	1	2	3,5,8	18
1010	2014	Wang, Bo; Stanton, Bonita; Deveaux, Lynette; Li, Xiaoming; Koci, Veronica; Lunn, Sonja	The impact of parent involvement in an effective adolescent risk reduction intervention on sexual risk communication and adolescent outcomes	AIDS Education and Prevention	26	6	500-520	Parent involvement in prevention efforts targeting adolescents increases the impact of such programs. However, the majority of risk-reduction intervention programs that are implemented through schools do not include parents, in part because most existing parental interventions require significant time commitment by parents. We designed a brief parent-adolescent sexual risk communication intervent…	1	1	1	1	2	1,6,7	36
1016	2014	Fraser-Mackenzie, Peter; Sung, Ming‐Chien; Johnson, Johnnie E. V.	Toward an understanding of the influence of cultural background and domain experience on the effects of risk‐pricing formats on risk perception	Risk Analysis	34	10	1846-1869	Risk‐information framing can be a powerful tool for aiding the communication of risk and improving decision making. However, little work has investigated the extent that these framing effects depend on the characteristics of the perceiver. In our study, we examine whether the effects of different risk‐pricing formats on risky choices are the same for all individuals, no matter their domain experi…	1	7	1	1	2	6	18
1017	2014	Engel, Jutta; Schlesinger-Raab, Anne; Emeny, Rebecca; Hölzel, Dieter; Schubert-Fritschle, Gabriele	Quality of life in women with localised breast cancer or malignant melanoma 2 years after initial treatment: A comparison	International Journal of Behavioral Medicine	21	3	478-486	Background: Two thirds of female breast cancer patients and more than 80 % of malignant melanoma patients are diagnosed with localised disease and good prognosis with a 5-year relative survival of more than 90 % in Germany. Purpose: This study was conducted to present quality of life (QoL) data from a German population-based cohort of female breast cancer and melanoma patients without recurrence …	1	1	1	1	1	8	24
1020	2014	Sweeny, Kate; Dillard, Amanda	The effects of expectation disconfirmation on appraisal, affect, and behavioral intentions	Risk Analysis	34	4	711-720	People’s risk perceptions can have powerful effects on their outcomes, yet little is known about how people respond to risk information that disconfirms a prior expectation. We experimentally examined the affective, cognitive, and behavioral consequences of expectation disconfirmation in the context of risk perceptions. Participants were randomly assigned and then prompted toward either a high or…	1	7	1	1	2	6	14
1023	2014	Glik, Deborah C.; Eisenman, David P.; Zhou, Qiong; Tseng, Chi-Hong; Asch, Steven M.	Using the Precaution Adoption Process model to describe a disaster preparedness intervention among low-income Latinos	Health Education Research	29	2	272-283	Only 40–50% of households in the United States are currently disaster prepared. In this intervention study, respondent-driven sampling was used to select a sample (n = 187) of low income, Latino residents of Los Angeles County, randomly assigned into two treatment conditions: (i) household preparedness education received through ‘promotora’ (community health worker) led small group meetings, and …	1	5	1	1	1	6	21
1024	2014	Keller, Carmen; Kreuzmair, Christina; Leins-Hess, Rebecca; Siegrist, Michael	Numeric and graphic risk information processing of high and low numerates in the intuitive and deliberative decision modes: An eye-tracker study	Judgment and Decision Making	9	5	420-432	The influence of numeracy on information processing of two risk communication formats (percentage and pictograph) was examined using an eye tracker. A sample from the general population (N = 159) was used. In intuitive and deliberative decision conditions, the participants were presented with a hypothetical scenario presenting a test result. The participants indicated their feelings and their per…	1	7	1	1	2	1	21
1029	2014	Hicks, Elisabeth M.; Litwin, Mark S.; Maliski, Sally L.	Latino men and familial risk communication about prostate cancer	Oncology Nursing Forum	41	5	509-516	Purpose/Objectives: To investigate how familial communication about prostate cancer (PCa) risk and screening affects sons of men with PCa. Research Approach: Qualitative grounded theory. Setting: Southern California. Participants: 17 Latino sons of PCa survivors. Methodologic Approach: The team conducted semistructured interviews and follow-up interviews. Therefore, the sample includes 25 transcr…	2	1	1	1	1	1,6	7
1030	2014	Brown, Danice L.; Rosnick, Christopher B.; Webb-Bradley, Traice; Kirner, Jonathan	Does daddy know best? Exploring the relationship between paternal sexual communication and safe sex practices among African-American women	Sex Education	14	3	241-256	Parental sexual risk communication may influence women's sexual decision-making and safe sexual behaviours. While many studies have focused specifically on the influence of communication from mothers, some authors have argued for the importance of examining father–daughter sexual risk communication as well. However, few studies have empirically examined this relationship among African-American wo…	1	1	1	1	1	6	13
1033	2014	Silk, Kami J.; Parrott, Roxanne L.	Math anxiety and exposure to statistics in messages about genetically modified foods: Effects of numeracy, math self-efficacy, and form of presentation	Journal of Health Communication	19	7	838-852	Health risks are often communicated to the lay public in statistical formats even though low math skills, or innumeracy, have been found to be prevalent among lay individuals. Although numeracy has been a topic of much research investigation, the role of math self-efficacy and math anxiety on health and risk communication processing has received scant attention from health communication researche…	1	2	1	1	2	1,6	5
1034	2014	Zaccaro, Antonella; Freda, Maria Francesca	Making sense of risk diagnosis in case of prenatal and reproductive genetic counselling for neuromuscular diseases	Journal of Health Psychology	19	3	344-357	This study explored the processes of significance about the risk communication in prenatal/preconception setting within 1 month to the end of genetic counselling intervention. Participants were all attending a programme of Cardiomyology and Medical Genetics in Naples, Italy, for the first time. Transcripts of 18 semi-structured interviews were analysed using interpretative phenomenological analys…	2	1	1	1	1	1,3,6	9
1035	2014	Garcia‐Retamero, Rocio; Cokely, Edward T.	The influence of skills, message frame, and visual aids on prevention of sexually transmitted diseases	Journal of Behavioral Decision Making	27	2	179-189	In a large three week longitudinal study, we investigated the efficacy of framed messages for promoting condom use in sexually active young adults. We also investigated the influence of key risk literacy skills (i.e., numeracy and graph literacy) and visual aids (i.e., icon arrays) on the efficacy of framed messages. Finally, we investigated the underlying psychological mechanisms of behavioral c…	1	7	1	1	2	3,6	50
1039	2014	De Dominicis, Stefano; Crano, William D.; Ganucci Cancellieri, Uberta; Mosco, Benedetta; Bonnes, Mirilia; Hohman, Zachary; Bonaiuto, Marino	Vested interest and environmental risk communication: Improving willingness to cope with impending disasters	Journal of Applied Social Psychology	44	5	364-374	Vested interest theory (VIT), first investigated on environmental risk, suggests that the hedonic relevance of an attitude object moderates relations between attitudes, intentions, and responses to danger. Emphasizing vested interest may maximize impacts of risk communications. Study 1 (N = 215) assessed differences between inhabitants of two flood‐risk areas in Italy on past experience, risk per…	1	5	1	1	2	6	30
1043	2014	Boer, Joop; Wouter Botzen, W. J.; Terpstra, Teun	Improving flood risk communication by focusing on prevention‐focused motivation	Risk Analysis	34	2	309-322	This article proposes an approach to flood risk communication that gives particular emphasis to the distinction between prevention and promotion motivation. According to E. Tory Higgins, the promotion system and the prevention system are assumed to coexist in every person, but one or the other may be temporarily or chronically more accessible. These insights have far-reaching implications for our…	1	5	1	1	2	3,6	26
1044	2014	Hu, Tian-Yi; Jiang, Xin-Wen; Xie, Xiaofei; Ma, Xiao-Qin; Xu, Chao	Foreground-background salience effect in traffic risk communication	Judgment and Decision Making	9	1	83-89	Pie charts are often used to communicate risk, such as the risk of driving. In the foreground-background salience effect (FBSE), foreground (probability of bad event) has greater salience than background (no bad event) in such a chart. Experiment 1 confirmed that the displays format of pie charts showed a typical FBSE. Experiment 2 showed that the FBSE resulted from a difference in cognitive effo…	1	7	1	1	2	3,6	6
1049	2013	Wändi Bruine de Bruin; Eric R Stone; Jacqueline MacDonald Gibson; Paul S Fischbeck; Mohammad Baradaran Shoraka	The effect of communication design and recipients’ numeracy on responses to UXO risk	Journal of Risk Research	16	8	981-1004	Risk communications aim to affect recipients’ understanding of specific risks, their trust and liking of the materials, affective responses, and associated behaviors. We developed communications about the number of construction workers expected to get hurt if building were permitted at the former Fort Ord weapons training site in California, despite its contamination with unexploded ordnance (UXO…	1	7	1	2	2	1,2,3,5,6	13
1053	2013	Giulio, Gabriela Marques Di; Figueiredo, Bernardino Ribeiro; Ferreira, Lúcia Costa; Macnaghten, Phil; Mañay, Nelly; Anjos, José Ângelo Sebastião Araújo dos	Participative risk communication as an important tool in medical geology studies	Journal of Geochemical Exploration	131		37-44	Risk situations related to brownfield sites, contaminated lands and groups exposed to toxic substances are common in South America. In some of these situations, there is a lack of institutional response to the risks and consequences coupled with a failure to communicate the risks to those affected. Drawing on empirical research in 4 South American communities exposed to lead contamination, we inv…	2	3	1	1	2	1,6	6
1057	2013	Bennear, Lori; Tarozzi, Alessandro; Pfaff, Alexander; Balasubramanya, Soumya; Ahmed, Kazi Matin; Geen, Alexander van	Impact of a randomized controlled trial in arsenic risk communication on household water-source choices in Bangladesh	Journal of Environmental Economics and Management	65	2	225-240	We conducted a randomized controlled trial in rural Bangladesh to examine how household drinking-water choices were affected by two different messages about risk from naturally occurring groundwater arsenic. Households in both randomized treatment arms were informed about the arsenic level in their well and whether that level was above or below the Bangladesh standard for arsenic. Households in o…	1	3	1	1,2	2	6	42
1061	2013	Park, Jee-Eun; Sohn, Aeree	The Influence of Media Communication on Risk Perception and Behavior Related to Mad Cow Disease in South Korea	Osong Public Health and Research Perspectives	4	4	203-208	Abstract Objectives The purpose of this study was to ascertain the influence of media communication on risk behavior related to mad cow disease (MCD). Methods Mothers of elementary school students in Seoul were recruited as the survey participants of this study. Results Media reports affected risk behavior related to MCD. Also, knowledge and attitude toward {MCD} affects risk behavior. Conclusion…	1	2	1	1	2	6	3
1077	2013	Watanabe, Hiroshi; Yamaguchi, Ichiro; Maehara, Yoshiaki; Koizumi, Mitsue; Fujibuchi, Toshioh; Kida, Tetsuo; Tsukamoto, Atsuko; Horitsugi, Genki; Hiraki, Hitoshi; Kimura, Yumi; Oyama, Masaya	[Evaluation of a risk communication approach for maintenance staff working with induced radioactivity in medical linear accelerators]	Nihon Hoshasen Gijutsu Gakkai zasshi	69	12	1353-1362	In order to promote consensus building on decommissioning operation rules for medical linear accelerators in Japan, we carried out a risk communication (RC) approach mainly providing knowledge for maintenance staff regarding induced radioactivity. In February 2012, we created a booklet (26 pages) to present an overview of the amended law, the mechanism and the distribution of induced radioactivit…	1	1	1	2	2	1,3	1
1087	2013	Neuner-Jehle, Stefan; Knecht, Marianne I.; Stey-Steurer, Claudia; Senn, Oliver	Acceptance and practicability of a visual communication tool in smoking cessation counselling: a randomised controlled trial	Primary Care Respiratory Journal : journal of the General Practice Airways Group	22	4	412-416	BACKGROUND: Smoking cessation advice is important for reducing the worldwide burden of disease resulting from tobacco smoking. Appropriate risk communication formats improve the success of counselling interventions in primary care. AIMS: To test the feasibility and acceptance of a smoking cessation counselling tool with different cardiovascular risk communication formats including graphs, in comp…	1	1	1	1,2	2	2,6	5
1088	2013	van der Krieke, Lian; Emerencia, Ando C.; Boonstra, Nynke; Wunderink, Lex; de Jonge, Peter; Sytema, Sjoerd	A web-based tool to support shared decision making for people with a psychotic disorder: randomized controlled trial and process evaluation	Journal of Medical Internet Research	15	10	e216	BACKGROUND: Mental health policy makers encourage the development of electronic decision aids to increase patient participation in medical decision making. Evidence is needed to determine whether these decision aids are helpful in clinical practice and whether they lead to increased patient involvement and better outcomes. OBJECTIVE: This study reports the outcome of a randomized controlled trial…	1	1	1	1	1	2,6	44
1102	2013	Driedger, S. Michelle; Cooper, Elizabeth; Jardine, Cindy; Furgal, Chris; Bartlett, Judith	Communicating risk to aboriginal peoples: first nations and Metis responses to H1N1 risk messages	PLoS One	8	8	e0071106	Developing appropriate risk messages during challenging situations like public health outbreaks is complicated. The focus of this paper is on how First Nations and Metis people in Manitoba, Canada, responded to the public health management of pandemic H1N1, using a focus group methodology (n = 23 focus groups). Focus group conversations explored participant reactions to messaging regarding the id…	2	1	2	1	2	1	19
1107	2013	Hart, P. Sol	The role of numeracy in moderating the influence of statistics in climate change messages	Public Understanding of Science (Bristol, England)	22	7	785-798	In recent years, researchers have examined how numerical ability may moderate an individual's response to different types of numeric information, but there is scant research examining how numerical ability may moderate responses to non-numeric vs. numeric information. The present study uses an experiment (complete data for 120 participants) to examine a moderated-mediation model that tests how nu…	1	6	1	1	2	3,6	24
1112	2013	Piening, Sigrid; de Graeff, Pieter A.; Straus, Sabine M. J. M.; Haaijer-Ruskamp, Flora M.; Mol, Peter G. M.	The Additional Value of an E-Mail to Inform Healthcare Professionals of a Drug Safety Issue: A Randomized Controlled Trial in the Netherlands	Drug Safety	36	9	723-731	BACKGROUND: The usefulness and the impact of Direct Healthcare Professional Communications (DHPCs, or 'Dear Doctor letters') in changing the clinical behaviour of physicians have been debated. Changes in the current risk communication methods should preferably be based on the preferences of the healthcare professionals, to optimize the uptake of the message. OBJECTIVE: The aim of this study was t…	1	1	1	2	2	1,3,6	6
1123	2013	Rupert, Douglas J.; Squiers, Linda B.; Renaud, Jeanette M.; Whitehead, Nedra S.; Osborn, Roger J.; Furberg, Robert D.; Squire, Claudia M.; Tzeng, Janice P.	Communicating risk of hereditary breast and ovarian cancer with an interactive decision support tool	Patient Education and Counseling	92	2	188-196	OBJECTIVE: Women with hereditary breast and ovarian cancer syndrome (HBOC) face a higher risk of earlier, more aggressive cancer. Because of HBOC's rarity, screening is recommended only for women with strong cancer family histories. However, most patients do not have accurate history available and struggle to understand genetic concepts. METHODS: Cancer in the Family, an online clinical decision …	1	1	1	1,2	2	1,3,6	16
1124	2013	Kraus, Carl N.; Baldwin, Alan T.; McAllister, R. G. Jr	Improving the effect of FDA-mandated drug safety alerts with Internet-based continuing medical education	Current Drug Safety	8	1	11-16	The US Food and Drug Administration (FDA) requires risk communication as an element of Risk Evaluation and Mitigation Strategies (REMS) to alert and educate healthcare providers about severe toxicities associated with approved drugs. The educational effectiveness of this approach has not been evaluated. To support the communication plan element of the ipilimumab REMS, a Medscape Safe Use Alert (S…	1	1	1	2	2	1	5
1128	2013	Henneman, Lidewij; Oosterwijk, Jan C.; van Asperen, Christi J.; Menko, Fred H.; Ockhuysen-Vermey, Caroline F.; Kostense, Piet J.; Claassen, Liesbeth; Timmermans, Danielle Rm	The effectiveness of a graphical presentation in addition to a frequency format in the context of familial breast cancer risk communication: a multicenter controlled trial	BMC Medical Informatics and Decision Making	13		55	BACKGROUND: Inadequate understanding of risk among counselees is a common problem in familial cancer clinics. It has been suggested that graphical displays can help counselees understand cancer risks and subsequent decision-making. We evaluated the effects of a graphical presentation in addition to a frequency format on counselees' understanding, psychological well-being, and preventive intention…	1	1	1	1	1	1,4,6	11
1130	2013	Quinn, Sandra Crouse; Parmer, John; Freimuth, Vicki S.; Hilyard, Karen M.; Musa, Donald; Kim, Kevin H.	Exploring communication, trust in government, and vaccination intention later in the 2009 H1N1 pandemic: results of a national survey	Biosecurity and Bioterrorism : Biodefense Strategy, Practice, and Science	11	2	96-106	With the growing recognition of the critical role that risk communication plays in a public health emergency, a number of articles have provided prescriptive best practices to enhance such communication. However, little empirical research has examined perceptions of the quality of communication, the impact of uncertainty on changing communication, use of information sources, and trust in specific…	1	1	1	1	2	5,6	29
1133	2013	Hunka, Agnieszka D.; Palmqvist, Annemette; Thorbek, Pernille; Forbes, Valery E.	Risk communication discourse among ecological risk assessment professionals and its implications for communication with nonexperts	Integrated Environmental Assessment and Management	9	4	616-622	Risk communication, especially to the general public and end users of plant protection products, is an important challenge. Currently, much of the risk communication the general public receives is via the popular press, and risk managers face the challenge of presenting their decisions and their scientific basis to the general public in an understandable way. Therefore, we decided to explore the …	1,2	3	1	2	2	1,3	6
1139	2013	Boerner, Franziska; Keelan, Jennifer; Winton, Laura; Jardine, Cindy; Driedger, S. Michelle	Understanding the interplay of factors informing vaccination behavior in three Canadian provinces	Human Vaccines & Immunotherapeutics	9	7	1477-1484	Arguably, the two most critical components in any response to a pandemic are effective risk communication and the rapid development of a vaccine. Despite the roll-out of a publicly-funded H1N1 vaccine program across the country, less than half of all Canadians were vaccinated during the 2009-10 pandemic. Using focus group data, this study examined vaccinating behaviors, the impact of public healt…	2	1	1	1	1,2	6	6
1142	2013	Fenichel, Eli P.; Kuminoff, Nicolai V.; Chowell, Gerardo	Skip the trip: air travelers' behavioral responses to pandemic influenza	PLoS One	8	3	e0058249	Theory suggests that human behavior has implications for disease spread. We examine the hypothesis that individuals engage in voluntary defensive behavior during an epidemic. We estimate the number of passengers missing previously purchased flights as a function of concern for swine flu or A/H1N1 influenza using 1.7 million detailed flight records, Google Trends, and the World Health Organization…	1	1	2	1	2	6	33
1144	2013	MacDonald Gibson, Jacqueline; Rowe, Aimee; Stone, Eric R.; Bruine de Bruin, Wandi	Communicating quantitative information about unexploded ordnance risks to the public	Environmental Science & Technology	47	9	4004-4013	Military base closures have left 600,000 acres of U.S. land contaminated with unexploded ordnance (UXO). Recent research has demonstrated a method for quantifying the probability of residual UXO harming future land users. Here, we explore how a community neighboring a closed, UXO-contaminated military base responds to the probabilistic risk information this method produces. We explore how probabi…	1	3	1	1	2	1,2,3,4,6	12
1146	2013	Rawson, Nigel S. B.; Terres, Jorge A. Ross	Rosiglitazone use and associated adverse event rates in Canada between 2004 and 2010	BMC Research Notes	6		82	BACKGROUND: We examined the change in the use of rosiglitazone-containing products (RCPs) Canada-wide between 2004 and 2010 and whether the rates of adverse events in association with RCP therapy in Canadian patients changed in this period to better understand the real world use of RCP medications and as part of a regulatory commitment by GlaxoSmithKline to Health Canada to assess whether there w…	3	1	1	2	2	6	10
1150	2013	Reber, K. C.; Piening, S.; Wieringa, J. E.; Straus, S. M. J. M.; Raine, J. M.; de Graeff, P. A.; Haaijer-Ruskamp, F. M.; Mol, P. G. M.	When direct health-care professional communications have an impact on inappropriate and unsafe use of medicines	Clinical Pharmacology and Therapeutics	93	4	360-365	Serious safety issues relating to drugs are communicated to health-care professionals via Direct Health-Care Professional Communications (DHPCs). We explored which characteristics determined the impact of DHPCs issued in the Netherlands for ambulatory-care drugs (2001-2008). With multiple linear regression, we examined the impact on the relative change in new drug use post-DHPC of the following: …	1	1	1	2	1	6	22
1154	2013	Kamada, Mikio; Moriyama, Masaki; Iwai, Kozue	A New Program for Healthy Eating Study Using a Card Game	Games for Health Journal	2	1	18-23	OBJECTIVE: A new program using a card game for study of children's food risk communication was developed to meet the needs of learning healthy eating. To examine the effects of the new program, an experiment was carried out in an elementary school with 132 students. MATERIALS AND METHODS: The game rules resemble those of common card games. Keeping seven cards in their hands, players exchange one …	1	2	1	1	2	2,8	2
1174	2013	Wu, Tongning; Shao, Qing; Yang, Lei; Qi, Dianyuan; Lin, Jun; Lin, Xiaojun; Yu, Zongying	A large-scale measurement of electromagnetic fields near GSM base stations in Guangxi, China for risk communication	Radiation Protection Dosimetry	155	1	25-31	Radiofrequency (RF) electromagnetic field (EMF) exposure from wireless telecommunication base station antennae can lead to debates, conflicts or litigations among the adjacent residents if inappropriately managed. This paper presents a measurement campaign for the GSM band EMF exposure in the vicinity of 827 base station sites (totally 6207 measurement points) in Guangxi, China. Measurement speci…	1	7	1	1	2	1,3	16
1179	2013	Longstaff, Holly; McDonald, Michael; Bailey, Jennifer	Communicating risks and benefits about ethically controversial topics: the case of induced pluripotent stem (iPS) cells	Stem Cell Reviews and Reports	9	4	388-396	Many are supportive of approaches that incorporate lay citizens into policy making and risk management decisions. However, a great deal of learning must first take place about how citizen engagement for controversial topics is best accomplished. Online risk communication efforts are increasing in popularity but there is little empirical evidence accrued to demonstrate the effectiveness of such me…	1	1	1	1	2	1,2,3,6	9
1180	2013	Erdozain, G.; KuKanich, K.; Chapman, B.; Powell, D.	Observation of public health risk behaviours, risk communication and hand hygiene at Kansas and Missouri petting zoos--2010-2011	Zoonoses and Public Health	60	4	304-310	Outbreaks of human illness have been linked to visiting settings with animal contact throughout developed countries. This study details an observational study of hand hygiene tool availability and recommendations; frequency of risky behaviour; and handwashing attempts by visitors in Kansas (9) and Missouri (4), USA, petting zoos. Handwashing signs and hand hygiene stations were available at the e…	1	1	1	1	2	6	27
1189	2013	King, E. L.; Grunseit, A. C.; O'Hara, B. J.; Bauman, A. E.	Evaluating the effectiveness of an Australian obesity mass-media campaign: How did the ‘Measure-Up’ campaign measure up in New South Wales?	Health Education Research	28	6	1029-1039	In 2008, the Australian Government launched a mass-media campaign ‘Measure-Up’ to reduce lifestyle-related chronic disease risk. Innovative campaign messages linked waist circumference and chronic disease risk. Communication channels for the campaign included television, press, radio and outdoor advertising and local community activities. This analysis examines the impact of the campaign in the s…	1	1	1	1	2	1,6,7	38
1196	2013	Wu, Alexander; Weseley, Allyson J.	The effects of statistical format and population specificity on adolescent perceptions of cell phone use while driving	Current Psychology: A Journal for Diverse Perspectives on Diverse Psychological Issues	32	1	32-43	Research on risk communication has established that people are influenced by numerical values as well as geographical reference points, or populations, in statistical messages. The ratio bias theory predicts that messages featuring higher casualty numbers will be more influential than similar messages featuring smaller values. However, research on the effects of population specificity predicts th…	1	7	1	1	2	3,6	1
1200	2013	Schmälzle, Ralf; Häcker, Frank; Renner, Britta; Honey, Christopher J.; Schupp, Harald T.	Neural correlates of risk perception during real-life risk communication	The Journal of Neuroscience	33	25	10340-10347	During global health crises, such as the recent H1N1 pandemic, the mass media provide the public with timely information regarding risk. To obtain new insights into how these messages are received, we measured neural data while participants, who differed in their preexisting H1N1 risk perceptions, viewed a TV report about H1N1. Intersubject correlation (ISC) of neural time courses was used to ass…	1	1	2	1	2	3	22
1205	2013	Cederbaum, Julie A.; Hutchinson, M. Katherine; Duan, Lei; Jemmott, Loretta S.	Maternal HIV serostatus, mother–daughter sexual risk communication and adolescent HIV risk beliefs and intentions	AIDS and Behavior	17	7	2540-2553	Daughters of HIV-positive women are often exposed to the same factors that placed their mothers at risk. This cross-sectional study (N = 176 dyads) examined HIV status, parent-teen sexual risk communication (PTSRC), and daughters’ abstinence and condom use beliefs and intentions. Maternal HIV status was not associated with PTSRC. Path analyses show that maternal depression was associated with PTS…	1	1	1	1	1	1,6	21
1206	2013	Bissett, Scott; Wood, Sharon; Cox, Richard; Scott, Donia; Cassell, Jackie	Calculating alcohol risk in a visualization tool for promoting healthy behavior	Patient Education and Counseling	92	2	167-173	Objective: To investigate effective methods for communicating the personalized risks of alcohol consumption, particularly to young people. Methods: An interactive computerized blood alcohol content calculator was implemented in Flash based on literature findings for effectively communicating risk. Young people were consulted on attitudes to the animation features and visualization techniques used…	2	1	1	1	2	1	10
1207	2013	Guthrie, Bruce; Clark, Stella A.; Reynish, Emma L.; McCowan, Colin; Morales, Daniel R.	Differential impact of two risk communications on antipsychotic prescribing to people with dementia in Scotland: Segmented regression time series analysis 2001–2011	PLoS One	8	7	e0068976	Background: Regulatory risk communications are an important method for disseminating drug safety information, but their impact varies. Two significant UK risk communications about antipsychotic use in older people with dementia were issued in 2004 and 2009. These varied considerably in their content and dissemination, allowing examination of their differential impact. Methods: Segmented regressio…	1	1	1	1,2	2	6	35
1208	2013	Anthony, Kathryn E.; Sellnow, Timothy L.; Millner, Alyssa G.	Message convergence as a message-centered approach to analyzing and improving risk communication	Journal of Applied Communication Research	41	4	346-364	This study introduces the message convergence framework, initially established by Perelman and Olbrechts-Tyteca, as means for comprehending and analyzing the process through which audiences simultaneously decipher pluralistic meaning from multiple sources typical of crisis events. Emphasizing Perelman and Olbrechts-Tyteca’s concept of plurality, the framework establishes three propositions: focus…	2	2	1	1	2	1,3	1
1211	2013	Verroen, Stephan; Gutteling, Jan M.; de Vries, Peter W.	Enhancing self‐protective behavior: Efficacy beliefs and peer feedback in risk communication	Risk Analysis	33	7	1252-1264	In times of a high-impact safety incident citizens may have a variety of sources available to help them cope with the situation. This research focuses on the interplay of efficacy information in risk communication messages and peer feedback, such as responses on social network sites (SNSs) in the context of a high-impact risk on the intention to engage in self-protective behavior. The study pitte…	1	5	1	1	2	6	44
1216	2013	Juanchich, Marie; Sirota, Miroslav	Do people really say it is "likely" when they believe it is only "possible"? Effect of politeness on risk communication	The Quarterly Journal of Experimental Psychology	66	7	1268-1275	Politeness theory posits that speakers can use verbal probabilities (e.g., there is a chance, it is likely) to hedge bad news. So far, only indirect evidence supports that claim: From the hearer’s standpoint, verbal probabilities are interpreted either as plain likelihood-communication devices or as face-management devices, resulting in different risk perceptions. The present research aims to tes…	1	7	1	1	2	3	10
1219	2013	Botzen, W. J. Wouter; de Boer, Joop; Terpstra, Teun	Framing of risk and preferences for annual and multi-year flood insurance	Journal of Economic Psychology	39		357-375	The decision of many individuals in floodplains to not purchase flood insurance may impair the risk-spreading function of flood insurance markets. This study estimates the effectiveness of risk communication frames and insurance policy conditions in increasing demand for flood insurance. It is examined how communication interacts with individual frames about the flood hazard that are rooted in re…	1	5	1	1	2	3	32
1224	2013	Janssen, Eva; van Osch, Liesbeth; de Vries, Hein; Lechner, Lilian	The influence of narrative risk communication on feelings of cancer risk	British Journal of Health Psychology	18	2	407-419	Objective: Evidence is accumulating for the importance of feelings of risk in explaining cancer preventive behaviours, but best practices for influencing these feelings are limited. The aim of this experimental study was to compare the effects of narrative and nonnarrative risk communication about sunbed use on ease of imagination and feelings of cancer risk. Design and methods: A total of 233 fe…	1	1	1	1	2	2,3,5,8	35
1225	2013	McClure, John; Velluppillai, Justin	The effects of news media reports on earthquake attributions and preventability judgments: Mixed messages about the Canterbury earthquake	Australasian Journal of Disaster and Trauma Studies	2013	1	27-36	The research examined the effects of two different types of message in the news media in the weeks following the February 2011, Canterbury earthquake. Fatalistic messages portrayed widespread, generalized damage with no reference to the performance of different types of buildings, whereas informed messages conveyed the distinctiveness of damage and the flawed design of most buildings that were da…	1	5	1	1	2	3	6
1226	2013	Pighin, Stefania; Savadori, Lucia; Barilli, Elisa; Rumiati, Rino; Bonalumi, Sara; Ferrari, Maurizio; Cremonesi, Laura	Using comparison scenarios to improve prenatal risk communication	Medical Decision Making	33	1	48-58	The present research provides empirical evidence of whether communicating the prenatal risk of chromosomal anomalies using comparison scenarios influences women’s ability to distinguish between different risk levels. In 2 experiments, participants read a description of a hypothetical woman who was learning of the risk of chromosomal anomaly as a result of a prenatal screening test. Both experimen…	1	1	1	1	2	3	7
1227	2013	Blanton, Hart; Gerrard, Meg; McClive-Reed, Kimberly P.	Threading the needle in health-risk communication: Increasing vulnerability salience while promoting self-worth	Journal of Health Communication	18	11	1279-1292	Health interventions often draw attention to the risks associated with unhealthy choice but in the process produce a boomerang effect such that those targeted become more committed to risky behavior. In 2 studies designed to promote condom use among sexually active college students, the authors document strategies for highlighting risk while promoting healthy choices. Study 1 demonstrated that op…	1	1	1	1	2	6	11
1228	2013	Cupp, Pamela K.; Atwood, Katharine A.; Byrnes, Hilary F.; Miller, Brenda A.; Fongkaew, Warunee; Chamratrithirong, Aphichat; Rhucharoenpornpanich, Orratai; Rosati, Michael J.; Chookhare, Warunee	The impact of Thai family matters on parent–adolescent sexual risk communication attitudes and behaviors	Journal of Health Communication	18	11	1384-1396	This article reports on a combined family-based substance abuse and HIV-prevention intervention targeting families with 13–14-year-old children in Bangkok, Thailand. Families (n = 340) were randomly and proportionally selected from 7 districts in Bangkok with half randomly assigned to an experimental or control condition. Families in the intervention condition were exposed to 5 interactive bookle…	1	1	1	1	1	6,8	17
1237	2013	Harris, Allyssa L.; Sutherland, Melissa A.; Hutchinson, M. Katherine	Parental influences of sexual risk among urban African American adolescent males	Journal of Nursing Scholarship	45	2	141-150	PURPOSE: This study examined the influence of parental marital status, parent-child sexual communication, parent-child closeness on the HIV-related knowledge, safer-sex intentions, and behaviors of late adolescent urban African American males. DESIGN: The study employed a cross-sectional design with retrospective recall of salient parental influences and behaviors. METHODS: Data were collected vi…	1	1	1	1	1	6,7	67
1238	2013	Cho, Hichang; Lee, Jae-Shin; Lee, Seungjo	Optimistic bias about H1N1 flu: Testing the links between risk communication, optimistic bias, and self-protection behavior	Health Communication	28	2	146-158	Using two-wave panel survey data (N = 348) collected in South Korea in the context of H1N1 flu, we explored several important aspects of optimistic bias that have been relatively unexplored in previous research, including: (a) the extent to which risk communication and indirect risk experience affect changes in optimistic bias over time; (b) the utility of the concept of optimistic bias to predic…	1	1	2	1	1,2	6	27
1244	2012	Milou Kievik; EFJ ter Huurne; Jan M Gutteling	The action suited to the word? Use of the framework of risk information seeking to understand risk-related behaviors	Journal of Risk Research	15	2	131-147	Although a growing body of risk communication research focuses on how people process risk information, one question that is overlooked is how the seeking of information contributes to behavioral adaptation toward the risk issue. How are people’s behavioral responses to risks affected by the search for risk information? Building on the Framework of Risk Information Seeking (FRIS), this paper repor…	1	3,5	2	1	2	6	18
1250	2012	Corinne Moser; Michael Stauffacher; Pius Krütli; Roland W Scholz	The influence of linear and cyclical temporal representations on risk perception of nuclear waste: an experimental study	Journal of Risk Research	15	5	459-476	Time is an important aspect of the issue of nuclear waste, both from a technical and from a perceptional perspective. Previous studies have investigated the relationship between time and risk perception of nuclear waste, applying the discounting paradigm and therefore limiting time to one very narrow aspect: its duration. However, time is a multifaceted concept and encompasses more than a linear …	1	4	1	1	2	3	13
1264	2012	Martin, Richard W.; Brower, Matthew E.; Geralds, Alexander; Gallagher, Patience J.; Tellinghuisen, Donald J.	An experimental evaluation of patient decision aid design to communicate the effects of medications on the rate of progression of structural joint damage in rheumatoid arthritis	Patient Education and Counseling	86	3	329-334	OBJECTIVE: To explore how effectively information presentation formats used in a patient decision aid communicated the ability of a disease modifying anti-rheumatic drug to slow the rate of progression of rheumatoid arthritis related structural joint damage (SJD). METHODS: 91 first year psychology students and 91 RA patients participated in a prospective randomized, single blind, factorial experi…	1	1	1	1	2	1,2	23
1274	2012	Msoffe, Peter L. M.; Kajuna, Flora F.; Cardona, Carol J.	Teacher-pupil model: improving poultry health and management through children	Avian Diseases	56	4 Suppl	1054-1057	The perception of risks of exposure to avian influenza and other poultry diseases among adults in Tanzania is influenced by their previous experiences, beliefs, and values, which can stand in the way of learning new approaches. We tested a novel disease risk communication approach centered on elementary school pupils, involving their teachers and parents. Age-appropriate training modules were dev…	1	1	1	1	2	1,6	1
1283	2012	Besser, Sarah Jane; Anderson, Janet E.; Weinman, John	How do osteoporosis patients perceive their illness and treatment? Implications for clinical practice	Archives of Osteoporosis	7	1-2	115-124	UNLABELLED: Non-adherence inhibits successful treatment of osteoporosis. This study used a theoretical framework to explore osteoporosis patients' cognitive and emotional representations of their illness and medication, using both interviews and drawing. We recorded some misconceptions patients have about their condition and medication which could act as barriers to treatment adherence. PURPOSE: …	2	1	1	1	1	1,3,5	37
1307	2012	Welschen, Laura M. C.; Bot, Sandra D. M.; Kostense, Piet J.; Dekker, Jacqueline M.; Timmermans, Danielle R. M.; van der Weijden, Trudy; Nijpels, Giel	Effects of cardiovascular disease risk communication for patients with type 2 diabetes on risk perception in a randomized controlled trial: the @RISK study	Diabetes Care	35	12	2485-2492	OBJECTIVE: Patients with type 2 diabetes mellitus (T2DM) underestimate their risk of developing severe complications, and they do not always understand the risk communication by their caregivers. The aim of this study was to investigate the effects of an intervention focused on the communication of the absolute 10-year risk of developing cardiovascular disease (CVD) in patients with T2DM. RESEARC…	1	1	1	1	1	1,2,3,6,	21
1318	2012	Legrand, Sara-Ann; Boets, Sofie; Meesmann, Uta; Verstraete, Alain G.	Medicines and driving: evaluation of training and software support for patient counselling by pharmacists	International Journal of Clinical Pharmacy	34	4	633-643	BACKGROUND: The consumption of some psychotropic medicines has a negative effect on the fitness to drive. Pharmacists are expected to give useful advice to patients on their participation in traffic. However, almost no information is available on this topic. OBJECTIVE: To assess the effect of training and implementation of new dispensing guidelines with regard to driving-impairing medicines, in t…	1	1	1	2	2	1,6	16
1319	2012	Perko, Tanja; Zeleznik, Nadja; Turcanu, Catrinel; Thijssen, Peter	Is knowledge important? Empirical research on nuclear risk communication in two countries	Health Physics	102	6	614-625	Increasing audience knowledge is often set as a primary objective of risk communication efforts. But is it worthwhile focusing risk communication strategies solely on enhancing specific knowledge? The main research questions tackled in this paper were: (1) if prior audience knowledge related to specific radiation risks is influential for the perception of these risks and the acceptance of communi…	1	4	1	1	2	3,6	21
1354	2012	Sirota, Miroslav; Juanchich, Marie	To what extent do politeness expectations shape risk perception? Even numerical probabilities are under their spell!	Acta Psychologica	141	3	391-399	Politeness theory posits that uncertainty quantifiers can be interpreted as hedging strategies and thus be perceived as communicating greater certainty than when they are interpreted as likelihood-communication devices. This has only been tested with verbal probabilities (e.g., it is possible). The present paper aims to test whether numerical probabilities can also be interpreted as face-manageme…	1	7	1	1	2	3	17
1358	2012	Harle, Christopher A.; Downs, Julie S.; Padman, Rema	Effectiveness of personalized and interactive health risk calculators: A randomized trial	Medical Decision Making	32	4	594-605	BACKGROUND: Risk calculators are popular websites that provide individualized disease risk assessments to the public. Little is known about their effect on risk perceptions and health behavior. OBJECTIVE: This study sought to test whether risk calculator features-namely, personalized estimates of one's disease risk and feedback about the effects of risk-mitigating behaviors-improve risk perceptio…	1	1	1	1	2	3,6	23
1360	2012	Rabinovich, Anna; Morton, Thomas A.	Unquestioned answers or unanswered questions: Beliefs about science guide responses to uncertainty in climate change risk communication	Risk Analysis	32	6	992-1002	In two experimental studies we investigated the effect of beliefs about the nature and purpose of science (classical vs. Kuhnian models of science) on responses to uncertainty in scientific messages about climate change risk. The results revealed a significant interaction between both measured (Study 1) and manipulated (Study 2) beliefs about science and the level of communicated uncertainty on w…	1	6	1	1	2	6	77
1364	2012	Sugerman, David E.; Keir, Jane M.; Dee, Deborah L.; Lipman, Harvey; Waterman, Stephen H.; Ginsberg, Michele; Fishbein, Daniel B.	Emergency health risk communication during the 2007 San Diego wildfires: Comprehension, compliance, and recall	Journal of Health Communication	17	6	698-712	In October 2007, wildfires burned nearly 300,000 acres in San Diego County, California. Emergency risk communication messages were broadcast to reduce community exposure to air pollution caused by the fires. The objective of this investigation was to determine residents’ exposure to, understanding of, and compliance with these messages. From March to June 2008, the authors surveyed San Diego Coun…	1	5	2	1	2	1,6	19
1370	2012	Melas, Philippe A.; Öhman, Susanne Georgsson; Juth, Niklas; Bui, The-Hung	Information related to prenatal genetic counseling: Interpretation by adolescents, effects on risk perception and ethical implications	Journal of Genetic Counseling	21	4	536-546	Being raised in the genomic era may not only increase knowledge of available genetic testing but may also have an impact on how genetic information is perceived. However, little is known about how current adolescents react to the language commonly used by health care professionals providing prenatal counseling. In addition, as risk communication is related to numbers and figures, having different…	1	1	1	1	2	3	9
1371	2012	Will, Kelli England; Dunaway, Krystall E.; Kokorelis, Diane A.; Sabo, Cynthia Shier; Lorek Jr., Edward J.	Challenges and opportunities for promoting booster seat use: Progressive dissemination of a high-threat message	Health Promotion Practice	13	6	772-778	Motivating parents to take certain safety precautions when traveling with their children remains challenging for advocates. Caregivers of booster-aged children are particularly difficult to reach because they do not consider their children to be of “safety-seat” age and have inherently low perceptions of vulnerability to crash injury. Unfortunately, most booster seat programs fail to adequately m…	1	7	1	1	2	1,3,6	2
1374	2012	Järvinen, Margaretha	A will to health? Drinking, risk and social class	Health, Risk & Society	14	3	241-256	This article explores risk conceptions related to alcohol use among Danes who drink ‘too much’ (based on the National Health Board’s standards for safe drinking). It analyses drinking patterns and risk management strategies among interviewees from different socio-economic backgrounds, and explores the differences between the behaviours and conceptions of these individuals and the risk advice and …	2	1	1	1	2	7	26
1378	2012	McCaffery, Kirsten J.; Dixon, Ann; Hayen, Andrew; Jansen, Jesse; Smith, Sian; Simpson, Judy M.	The influence of graphic display format on the interpretations of quantitative risk information among adults with lower education and literacy: A randomized experimental study	Medical Decision Making	32	4	532-544	OBJECTIVE: To test optimal graphic risk communication formats for presenting small probabilities using graphics with a denominator of 1000 to adults with lower education and literacy. METHODS: A randomized experimental study, which took place in adult basic education classes in Sydney, Australia. The participants were 120 adults with lower education and literacy. An experimental computer-based ma…	1	1	1	1	2	1,2	62
1379	2012	Juanchich, Marie; Sirota, Miroslav; Butler, Christina Lea	The perceived functions of linguistic risk quantifiers and their effect on risk, negativity perception and decision making	Organizational Behavior and Human Decision Processes	118	1	72-81	When someone is told: “it is possible that you will lose your investment”, “possible” can be interpreted as plainly reflecting the speaker’s degree of certainty (i.e., likelihood-communication device) or as tactfully communicating the probable occurrence of losses (i.e., hearer-face-management device). We suggest that risk quantifiers can also serve the speaker’s interest by decreasing the chance…	1	7	1	1	2	3,6	33
1386	2012	Ilic, Dragan; Murphy, Kerry; Green, Sally	Risk communication and prostate cancer: Identifying which summary statistics are best understood by men	American Journal of Men's Health	6	6	497-504	The format in which risk is communicated influences how patients make health care decisions. The same statistical information may be summarized differently according to relative risk reduction, absolute risk reduction, number needed to treat, or odds ratio. A total of 76 men participated in focus groups exploring their understanding of information about prostate cancer treatments when framed acro…	2	1	1	1	1	1	5
1392	2012	Vogt, Claudia; Schaefer, Marion	Knowledge matters — Impact of two types of information brochure on contraceptive knowledge, attitudes and intentions	The European Journal of Contraception and Reproductive Health Care	17	2	135-143	OBJECTIVE: To compare the effect of two types of counselling brochure on knowledge, attitudes and intention towards combined oral contraceptives (COCs). STUDY DESIGN: Double-blind, parallel-group randomised trial conducted in Germany. Nulliparous women aged 18–24 years were randomly assigned to receive one of two comprehensive information brochures about COCs, their benefits and risks, and altern…	1	1	1	1	2	1,6	10
1396	2011	Md Atikul Islam; Hiroyuki Sakakibara; Md Rezaul Karim; Masahiko Sekine	Evaluation of risk communication for rural water supply management: a case study of a coastal area of Bangladesh	Journal of Risk Research	14	10	1237-1262	Consumption of safe drinking water is an important public health issue. In this study, we considered the risk communication topic of human health concerns related to unsafe water consumption in rural coastal areas of Bangladesh, where potable water is scarce. Our objective was to investigate the level of knowledge that rural residents had concerning safe water consumption and to evaluate the effe…	1	7	1	1	2	1,6	5
1399	2011	Rebecca Hess; Vivianne HM Visschers; Michael Siegrist; Carmen Keller	How do people perceive graphical risk communication? The role of subjective numeracy	Journal of Risk Research	14	1	47-61	This study aims to evaluate directly how a graphical risk ladder is perceived and how this perception is related to people’s subjective numeracy. Gaze durations and frequencies were used to examine visual attention. Participants (N = 47) appeared to focus on the target risk information, whereas referential information was less attended. Subjective numeracy was negatively correlated with total wat…	1	7	1	1	2	8	29
1403	2011	Tiozzo, Barbara; Mari, Silvia; Magaudda, Paolo; Arzenton, Valeria; Capozza, Dora; Neresini, Federico; Ravarotto, Licia	Development and evaluation of a risk-communication campaign on salmonellosis	Food Control	22	1	109-117	Risk-communication campaigns are important means of promoting food safety. Although foodborne diseases are a widespread public-health problem, in Italy few communication campaigns have focused on such diseases. In 2007, we launched a public risk-communication campaign on salmonellosis. The initiative, based on communication theory, included a formative research, aimed to outline key aspects for c…	2	2	1	1	2	1,2,6	1
1404	2011	Powers, Benjamin J.; Danus, Susanne; Grubber, Janet M.; Olsen, Maren K.; Oddone, Eugene Z.; Bosworth, Hayden B.	The effectiveness of personalized coronary heart disease and stroke risk communication	American Heart Journal	161	4	673-680	BACKGROUND: Current guidelines recommend global risk assessment to guide vascular risk factor management; however, most provider-patient communication focuses on individual risk factors in isolation. We sought to evaluate the impact of personalized coronary heart disease and stroke risk communication on patients' knowledge, beliefs, and health behavior. METHODS: We conducted a randomized controll…	1	1	1	1	1	1,2,3,6	39
1420	2011	Garcia-Retamero, Rocio; Galesic, Mirta	Using plausible group sizes to communicate information about medical risks	Patient Education and Counseling	84	2	245-250	OBJECTIVE: To make informed health decisions, patients must understand and recall risks, which often involve ratios with large denominators. Grasping the meaning of such numbers may be difficult, because of limited exposure to large groups of people in either our evolutionary history or daily life. METHODS: In an experiment (n=98), we investigated whether medical risks are easier to understand an…	1	1	1	1,2	1	1	47
1437	2011	Kasper, Jurgen; Heesen, Christoph; Kopke, Sascha; Muhlhauser, Ingrid; Lenz, Matthias	Why not? - Communicating stochastic information by use of unsorted frequency pictograms - a randomised controlled trial	Psycho-Social Medicine	8		Doc08	OBJECTIVE: Statistical health risk information has been proven confusing and difficult to understand. While existing research indicates that presenting risk information in frequency formats is superior to relative risk and probability formats, the optimal design of frequency formats is still unclear. The aim of this study was to compare presentation of multi-figure pictographs in consecutive and …	1	1,7	1	1	2	1	6
1464	2011	Hudson, Ben; Toop, Les; Mangin, Dee; Pearson, John	Risk communication methods in hip fracture prevention: a randomised trial in primary care	The British Journal of General Practice : the journal of the Royal College of General Practitioners	61	589	e469-476	BACKGROUND: Treatment acceptance by patients is influenced by the way treatment effects are presented. Presentation of benefits using relative risk increases treatment acceptance compared to the use of absolute risk. It is not known whether this effect is modified by prior presentation of a patient's individualised risk estimate or how presentation of treatment harms by relative or absolute risk …	1	1	1	1	1	6	7
1470	2011	Pighin, Stefania; Bonnefon, Jean-Francois; Savadori, Lucia	Overcoming number numbness in prenatal risk communication	Prenatal Diagnosis	31	8	809-813	OBJECTIVE: Efficient prenatal risk communication hinges upon parents' grasp of statistical information. When forming their subjective representation of a probability, pregnant women may focus on inappropriate factors and ignore the appropriate factors. METHOD: The present research investigates the subjective probability that pregnant women derive from statements of the form 'There is a 1 in X cha…	1	1	1	1	1	3	15
1487	2011	Neuner-Jehle, Stefan; Senn, Oliver; Wegwarth, Odette; Rosemann, Thomas; Steurer, Johann	How do family physicians communicate about cardiovascular risk? Frequencies and determinants of different communication formats	BMC Family Practice	12		15	BACKGROUND: Patients understand information about risk better if it is communicated in numerical or visual formats (e.g. graphs) compared to verbal qualifiers only. How frequently different communication formats are used in clinical primary care settings is unknown. METHODS: We collected socioeconomic and patient understanding data using questionnaires and audio-recorded consultations about cardi…	1	1	1	1	1	1	38
1511	2011	Hoffman, Leah; Nguyen, Ha Thi Thu; Kershaw, Trace S.; Niccolai, Linda M.	Dangerous subtlety: Relationship-related determinants of consistency of condom use among female sex workers and their regular, non-commercial partners in Hai Phong, Viet Nam	AIDS and Behavior	15	7	1372-1380	Research indicates female sex workers use condoms more consistently with their clients than with regular, non-commercial partners (partners). The purpose of this study was to better understand the relationship between couple communication and HIV risk behavior by examining (1) sex worker-partner divergence on communication measures and (2) the association between intra-couple communication diverg…	1	1	1	1	1	6	22
1516	2011	Vet, R.; de Wit, J. B. F.; Das, E.	The efficacy of social role models to increase motivation to obtain vaccination against hepatitis B among men who have sex with men	Health Education Research	26	2	192-200	This study assessed the effects of role models in persuasive messages about risk and social norms to increase motivation to obtain hepatitis B virus (HBV) vaccination in men who have sex with men (MSM). MSM at risk for HBV in The Netherlands (N = 168) were recruited online via a range of websites and were randomly assigned to one of four conditions in a 2 (risk communication: yes and no) x 2 (soc…	1	1	1	1	2	3,6	9
1519	2011	Poortinga, Wouter; Bronstering, Karin; Lannon, Simon	Awareness and perceptions of the risks of exposure to indoor radon: A population‐based approach to evaluate a radon awareness and testing campaign in England and Wales	Risk Analysis	31	11	1800-1812	The current study aimed to evaluate the locally directed radon roll-out program that was conducted between 2001 and 2005 in England and Wales to increase radon awareness and testing rates. A representative sample of 1,578 residents aged 16 and older were interviewed who lived in radon-affected areas of 15 local authorities in England and Wales that were eligible for participation in the program. …	1	3	1	1	2	1,6	30
1524	2011	Xie, Xiao‐Fei; Wang, Mei; Zhang, Ruo‐Gu; Li, Jie; Yu, Qing‐Yuan	The role of emotions in risk communication	Risk Analysis	31	3	450-465	We present two experiments investigating the role of emotions concerning technological and natural hazards. In the first experiment, technological hazards aroused stronger emotions, and were considered to be riskier than natural hazards. No differences were found between the texts versus audio presentations. However, the presence of pictures aroused stronger emotions and increased the perceived r…	1	5,7	1	1	2	3	61
1527	2011	Brown, Sandra M.; Culver, Julie O.; Osann, Kathryn E.; MacDonald, Deborah J.; Sand, Sharon; Thornton, Andrea A.; Grant, Marcia; Bowen, Deborah J.; Metcalfe, Kelly A.; Burke, Harry B.; Robson, Mark E.; Friedman, Susan; Weitzel, Jeffrey N.	Health literacy, numeracy, and interpretation of graphical breast cancer risk estimates	Patient Education and Counseling	83	1	92-98	OBJECTIVE: Health literacy and numeracy are necessary to understand health information and to make informed medical decisions. This study explored the relationships among health literacy, numeracy, and ability to accurately interpret graphical representations of breast cancer risk. METHODS: Participants (N=120) were recruited from the Facing Our Risk of Cancer Empowered (FORCE) membership. Health…	1	1	1	1	1	1,6	67
1528	2011	Soureti, Anastasia; Murray, Peter; Cobain, Mark; van Mechelen, Willem; Hurling, Robert	Web-based risk communication and planning in an obese population: Exploratory study	Journal of Medical Internet Research	13	4	e100	BACKGROUND: A healthy diet, low in saturated fat and high in fiber, is a popular medical recommendation in preventing cardiovascular disease (CVD). One approach to motivating healthier eating is to raise individuals' awareness of their CVD risk and then help them form specific plans to change. OBJECTIVES: The aim was to explore the combined impact of a Web-based CVD risk message and a fully autom…	1	1	1	1	2	3,6	7
1533	2011	Mevissen, Fraukje E. F.; Ruiter, Robert A. C.; Meertens, Ree M.; Zimbile, Filippo; Schaalma, Herman P.	Justify your love: Testing an online STI-risk communication intervention designed to promote condom use and STI-testing	Psychology & Health	26	2	205-221	The efficacy of a tailored, web-based intervention communicating the risks of sexually transmitted infections (STI) for heterosexual young adults was examined in a randomised, controlled trial. The main aims of the relationship-oriented intervention were to influence risk perceptions and to promote (maintenance of) condom use and STI-testing among young adults who reported being recently engaged …	1	1	1	1	2	3,6,7	51
1534	2011	Pighin, Stefania; Savadori, Lucia; Barilli, Elisa; Cremonesi, Laura; Ferrari, Maurizio; Bonnefon, Jean-François	The 1-in-X effect on the subjective assessment of medical probabilities	Medical Decision Making	31	5	721-729	Among numerical formats available to express probability, ratios are extensively used in risk communication, perhaps because of the health professional’s intuitive sense of their clarity and simplicity. Moreover, health professionals, in the attempt to make the data more meaningful, tend to prefer proportions with a numerator of 1 and shifting denominators (e.g., 1 in 200) rather than equivalent …	1	1	1	1	2	3	24
1537	2011	Gardner, Peter H.; McMillan, Brian; Raynor, David K.; Woolf, Elizabeth; Knapp, Peter	The effect of numeracy on the comprehension of information about medicines in users of a patient information website	Patient Education and Counseling	83	3	398-403	Objective: To investigate the relationship between numeracy and the accuracy of side effect risk estimation following the presentation of information about a medicine via the Cancer Research UK (CR-UK) patient information website. Methods: 591 website users were presented with information in different formats about the risks of side effects from taking tamoxifen. Participants estimated the risk o…	1	1	1	1	1	1,2,6	42
1541	2011	Keller, Carmen	Using a familiar risk comparison within a risk ladder to improve risk understanding by low numerates: A study of visual attention	Risk Analysis	31	7	1043-1054	Previous experimental research provides evidence that a familiar risk comparison within a risk ladder is understood by low‐ and high‐numerate individuals. It especially helps low numerates to better evaluate risk. In the present study, an eye tracker was used to capture individuals’ visual attention to a familiar risk comparison, such as the risk associated with smoking. Two parameters of informa…	1	1	1	1	2	1,3	23
1543	2011	Binder, Andrew R.; Scheufele, Dietram A.; Brossard, Dominique; Gunther, Albert C.	Interpersonal amplification of risk? Citizen discussions and their impact on perceptions of risks and benefits of a biological research facility	Risk Analysis	31	2	324-334	Much risk communication research has demonstrated how mass media can influence individual risk perceptions, but lacks a comprehensive conceptual understanding of another key channel of communication: interpersonal discussion. Using the social amplification of risk as a theoretical framework, we consider the potential for discussions to function as amplification stations. We explore this possibili…	1	5	1	1	1	3	62
1546	2011	Garcia‐Retamero, Rocio; Dhami, Mandeep K.	Pictures speak louder than numbers: On communicating medical risks to immigrants with limited non‐native language proficiency	Health Expectations: An International Journal of Public Participation in Health Care & Health Policy	14	Suppl 1	46-57	Background and objectives: Medical risk communication has been infrequently studied in immigrants with limited non-native language proficiency, even though they may be at greatest risk of illness. In a study, we examined to what extent Polish immigrants to the UK have difficulties in understanding treatment risk reduction expressed as ratios either in their native language or in a non-native lang…	1	1	1	1	1	1	61
1547	2011	Hess, Rebecca; Visschers, Vivianne H. M.; Siegrist, Michael	Risk communication with pictographs: The role of numeracy and graph processing	Judgment and Decision Making	6	3	263-274	We conducted three studies to investigate how well pictographs communicate medical screening information to persons with higher and lower numeracy skills. In Study 1, we conducted a 2 (probability level: higher vs. lower) × 2 (reference information: yes vs. no) × 2 (subjective numeracy: higher vs. lower) between-subjects design. Persons with higher numeracy skills were influenced by probability l…	1	1	1	1	2	3	52
1548	2011	Scurich, Nicholas; John, Richard S.	The effect of framing actuarial risk probabilities on involuntary civil commitment decisions	Law and Human Behavior	35	2	83-91	Despite a proliferation of actuarial risk assessment instruments, empirical research on the communication of violence risk is scant and there is virtually no research on the consumption of actuarial risk assessment. Using a 2 × 3 Latin Square factorial design, this experiment tested whether decision-makers are sensitive to varying levels of risk expressed probabilistically and whether the framing…	1	7	1	1	2	6	46
1549	2011	Garcia-Retamero, Rocio; Cokely, Edward T.	Effective communication of risks to young adults: Using message framing and visual aids to increase condom use and STD screening	Journal of Experimental Psychology: Applied	17	3	270-287	Sexually Transmitted Diseases (STDs)—including HIV/AIDS—are among the most common infectious diseases in young adults. How can we effectively promote prevention and detection of STDs in this high risk population? In a two-phase longitudinal experiment we examined the effects of a brief risk awareness intervention (i.e., a sexual health information brochure) in a large sample of sexually active yo…	1	1	1	1	2	2,3,6	157
